# Supplementary material
Source: PubMed Central journal article supplement (PMC7309329)
Supplement: es9b06773_si_001.pdf [file es9b06773_si_001.pdf]

# Fluorine Mass Balance and Suspect Screening in Marine Mammals from the Northern Hemisphere

## Supporting Information

*Kyra M. Spaan<sup>1\*</sup>, Carmen van Noordenburg<sup>1</sup>, Merle M. Plassmann<sup>1</sup>, Lara Schultes<sup>1</sup>, Susan Shaw<sup>2</sup>, Michelle Berger<sup>2</sup>, Mads Peter Heide-Jørgensen<sup>3</sup>, Aqqalu Rosing-Asvid<sup>3</sup>, Sandra M. Granquist<sup>4,5</sup>, Rune Dietz<sup>6</sup>, Christian Sonne<sup>6</sup>, Frank Rigét<sup>6</sup>, Anna Roos<sup>3,7</sup>, Jonathan P. Benskin<sup>1\*</sup>*

<sup>1</sup>Department of Environmental Science, Stockholm University, Svante Arrhenius Väg 8, 106 91, Stockholm, Sweden.

<sup>2</sup>Shaw Institute, P.O. Box 1652, Blue Hill, ME 04614

<sup>3</sup>Greenland Institute of Natural Resources, Nuuk, Greenland

<sup>4</sup>Marine and Freshwater Research Institute, Skúlagata 4, 101 Reykjavík, Iceland.

<sup>5</sup>The Icelandic Seal Center, Brekkugata 2, 530 Hvammstangi, Iceland

<sup>6</sup>Aarhus University, Department of Bioscience, Arctic Research Centre (ARC), Frederiksborgej 399, PO Box 358, DK-4000 Roskilde, Denmark

<sup>7</sup>Department of Environmental Research and Monitoring, Swedish Museum of Natural History, Box 50007, 104 05 Stockholm, Sweden

\*Corresponding authors:

[Kyra.Spaan@aces.su.se](mailto:Kyra.Spaan@aces.su.se)

[Jon.Benskin@aces.su.se](mailto:Jon.Benskin@aces.su.se)

Number of Pages: 38

Number of Figures: 13

Number of Tables: 10

## Chemicals and Reagents

Methanol (99.8%, LiChrosolv®) and ammonium acetate (98%) were purchased from Merck (Darmstadt, Germany). Acetonitrile ( $\geq 99.9\%$ , Chromasolv™) was obtained from Honeywell (France). Water was purified by a millipore water purification system and had a resistance  $<18$  M $\Omega$ /cm (Milli-Q water). Fluoride standard (1000 mg/L) was obtained from Thermo Scientific. EnviCarb (Supelclean™) was obtained from Sigma Aldrich. Stainless steel beads (4.8 mm) were purchased from Next Advance©. Certified NIST serum (SRM 1957) was used for quality control. For CIC analysis, argon and oxygen gases were of purity grade 5.0 and the certified reference material (CRM) clay (BCR-461) was purchased from Sigma Aldrich.

## Sample preparation

### *Targeted analysis*

The extraction method was based on the method described by Powley et al. (2005) and was performed as follows. For each sample about 0.5 g of liver was thawed at room temperature and 50  $\mu$ l of internal standard (IS) solution (20 pg/ $\mu$ l) was added to each sample prior to extraction. Extraction was performed by adding 4 ml acetonitrile (ACN) together with 7-8 beads (stainless steel  $\varnothing$  4.8 mm); thereafter the samples were homogenized in a bead blender (SPEX SamplePrep 1600 MiniG®) for 5 min at 1500 rpm. The samples were then centrifuged at 2000 rpm for 5 min (Centrifuge 5810, Eppendorf, Hamburg) and the supernatant was transferred to a new 13 ml PP-tube. The precipitate was extracted one more time by adding another 4 ml ACN, and vortexing, blending, and centrifuging again. The supernatant was added to the existing tube with the previous supernatant. The combined extracts were concentrated to  $\sim 1$  ml under a stream of nitrogen in a water bath at 40 °C (TurboVap LV Evaporator, Biotage). The concentrated extracts were weighed and added to a 1.7 ml Eppendorf tube containing 25 mg EnviCarb and 50  $\mu$ l acetic acid. The tubes were vortexed and centrifuged for 10 min at 10 000 rpm (Galaxy 14D, Microcentrifuge, VWR). Then 500  $\mu$ l of the supernatant were transferred to another Eppendorf tube. To this 50  $\mu$ l recovery standard (RS) solution (20 pg/ $\mu$ l  $^{13}\text{C}_8$ -PFOA and  $^{13}\text{C}_8$ -PFOS) and 500  $\mu$ l  $\text{NH}_4\text{OAc}$  (4 mM in water) were added and the extracts were stored at -20 °C until analysis. On the day of analysis, the extract was adjusted to room temperature, vortex-mixed and transferred to an LC vial.

### *Clean-up step test*

Two clean-up steps were evaluated for their potential to remove inorganic fluorine and recovery of target analytes: 1) a solid phase extraction (SPE)-based clean-up, and 2) an EnviCarb-based clean-up. The SPE extraction method was based on Miyake et al.<sup>2</sup> and the EnviCarb extraction on Powley et al.<sup>1</sup> Fish muscle samples were spiked with 250 ng PFOS (~162 ng F) and 500 ng NaF. Method blanks showed high concentrations for the SPE clean-up with high variation, while the method blanks for the EnviCarb clean-up step were rather low and consistent. The unspiked samples showed similar concentrations for both methods, however EnviCarb showed a bit higher deviation. PFOS and NaF recoveries were calculated according to the following formula:

$$\text{Recovery (\%)} = \frac{\text{Measured spike (ng F)} - \text{Measured no spike (ng F)}}{\text{Spiked concentration (ng F)}} \times 100\%$$

PFOS recovery was high for both methods, i.e. 96% and 92% for SPE and EnviCarb, respectively. Both extraction methods aim to remove inorganic fluorine, such as NaF, and get as low recovery as possible. NaF recovery was 12.5% and -0.2% for SPE and EnviCarb, respectively. Only the EnviCarb method was able to remove the inorganic fluorine effectively. After this extraction method comparison, EnviCarb was found to be the best suitable to use for analysis of the real samples, since this approach resulted in lower method blanks and more efficient removal of inorganic fluorine and was therefore considered the most suitable clean-up method.

#### *Total and extractable organofluorine*

A similar extraction procedure was applied to the liver samples prior to analysis with the CIC. Since the CIC measures the total fluorine concentration, no internal standards were added, also no NH<sub>4</sub>OAc was added in the end. The final extracts (~ 1 ml) were split into two parts, in order to have a replicate of each sample. Also, since the sample boats have limited sample space, the final split extracts were concentrated to ~200 µl under a stream of nitrogen.

### **Instrumental Analysis**

#### *Targeted analysis*

The system was operated in negative ion electrospray ionization (ESI-) mode. The source and desolvation temperatures were set at 150 °C and 350 °C, respectively. The desolvation and cone gas flows (nitrogen) were set at 650 L/h and 150 L/h, respectively. The capillary voltage was set at 1.0 kV. Qualification and quantification were carried out using MassLynx 4.1 (Waters).

Quantification was performed using internal standards via a 9-point calibration curve ranging from 0.008 to 150 ng/ml (linear, 1/x weighting). Precursor and product ions are presented in Table S7. Analytes lacking an analogous labeled standard were quantified using the IS with the closest retention time and the data quality was defined as semi-quantitative (semiQ). Branched isomers were quantified using the calibration curve of the linear isomer.

#### *Total and extractable organofluorine analysis*

Measurements of total fluorine (TF) and extractable organofluorine (EOF) were carried out using a Thermo-Mitsubishi CIC using previously described methods.<sup>3,4</sup> Briefly, extracts (~200 µl for samples and 100 µl for standards) were placed in a ceramic sample boat containing glass wool (for fluid dispersion), while neat liver material (~100 mg) was weighed directly into the sample boat. The samples were combusted slowly in a horizontal furnace (HF-210, Mitsubishi) at 1100 °C under a flow of oxygen (400 ml/min), argon (200 ml/min), and argon mixed with water vapor (100 ml/min) for approximately 5 minutes. Combustion gases were absorbed in MilliQ water during the entire length of the combustion process using a gas absorber unit (GA-210, Mitsubishi). A 200 µl aliquot of the absorption solution was subsequently injected onto an ion chromatograph (Dionex Integrion HPIC, Thermo Fisher Scientific) equipped with an anion exchange column (2 × 50 mm guard column (Dionex IonPac AS19-4µm) and 2 × 250 mm analytical column (Dionex IonPac AS19-4µm) operated at 30 °C. Chromatographic separation was achieved by running a gradient of aqueous hydroxide mobile phase ramping from 8 mM to 100 mM at a flow rate of 0.25 ml/min (Table S8), and fluoride was detected using a conductivity detector. Quantification was carried out using a standard calibration curve prepared at 0.05 to 100 µg F/ml. The calibration curve showed very good linearity with  $R^2 > 0.98$ . The mean fluoride concentration in the method blanks was subtracted from the samples. The method detection limit (MDL) was defined as the mean concentration plus three times the standard deviation in the method blanks.

#### *Suspect screening*

Suspect screening was carried out using a Dionex Ultimate 3000 liquid chromatograph coupled to a Q Exactive HF Orbitrap (Thermo Scientific), based on a previously described method.<sup>5</sup> The flow rate was held constant at 0.4 ml per minute throughout the run. The mobile phases and eluent program used for non-target/suspect screening were the same as those used for target analysis (i.e.

by UPLC-MS/MS). The instrument was run in negative ion, full scan (200-1200 m/z) data dependent acquisition (DDA) MS/MS mode (50-1200 m/z). The resolution was set to 120 000 (15 000 for MS/MS), the automatic gain control (AGC) was set to 3e6, and other instrumental parameters are presented in Table S11. Briefly, CL = 5 is assigned when only the exact mass is known. CL = 4 is used when the unknown analyte ion can be assigned an unambiguous formula, but no structural information is available. CL = 3 represents tentative candidates whose possible structure can be proposed but lack sufficient information to assign an exact structure. CL = 2a represents probable structures by comparing to library spectra where spectrum-structure is unambiguous. CL = 2b can be assigned when no standard or literature information is available for confirmation and there is only diagnostic evidence. Finally, CL = 1 represents confirmed structures, that match a reference standard with MS, MS/MS and RT.

## Quality Control

### *Targeted analysis*

Limits of quantification (LOQs) were determined by the lowest calibration concentration that showed a well-shaped peak with intensity  $>1e3$  and signal-to-noise (S/N)  $>3$ . For compounds that were not present in the calibration standard, but that were detected in the samples (PFPeDA, PFHpS, and branched isomers), the LOQ from the corresponding standard was used. For compounds where method blank contamination was observed (PFBS, PFOS, and FOSAA), the LOQ was determined as the average of the quantified concentrations in the method blanks plus ten times the standard deviation. The compound-specific LOQs are listed in Table S6.

Method accuracy and precision for most substances was very good, with percent recoveries ranging from 73-130% and standard deviations ranging from 3-30% (Figure S2). The exceptions were for PFHxDA, PFOcDA, 4:2 FTSA, and 8:2 FTSA, which showed very high recoveries (278%, 397%, 212%, and 227%, respectively), while HFPO-DA, 3:3 FTCA, 5:3 FTCA, and 7:3 FTCA showed very low recoveries (22%, 34%, 55%, and 53%, respectively). These deviating recoveries are likely due to matrix effects, which were not accounted for because of the absence of an exactly matching isotopically-labeled internal standard. Nevertheless, the targets with very high recoveries were included in the analysis, since their concentrations in the samples were so low ( $<1$  ng/g, ww). The targets with low recoveries were also included in the analysis, albeit

measured concentrations may be underreported. Finally, the method was externally validated by analyzing a standard reference material (SRM) sample of NIST serum 1957. Results are presented in Table S9 and were generally in good agreement with certified values and prior measurements of this material by other researchers.

#### *Total and extractable organofluorine*

All boats were baked out prior to sample combustion to minimize background contamination. Each run started and ended with a calibration curve and after every 8-10 samples, a blank and a mid-level calibration standard were analyzed for quality control. The removal efficiency of inorganic fluoride was tested by spiking a range of known concentrations of NaF (0.25, 0.5, 0.75, 1, and 2  $\mu\text{g}$ ) into liver tissue followed by extraction (Figure S3). Furthermore, recovery of organic fluoride was determined by spiking PFOS (0.08, 0.13, 0.25, 0.5, and 1  $\mu\text{g/ml}$ ) to liver tissue and performing the extraction (Figure S4). CIC analysis of both the extracted liver residue and the EnviCarb used for clean-up showed that the inorganic fluoride remained in the extracted liver; in other words, it was not extracted during the initial acetonitrile extraction step. The obtained recovery for PFOS was used to correct the measured concentrations of EOF in real samples. In theory, since the recovery is different for each target analyte, the recovery should be determined for each individual compound. However, practically this would mean a large number of experiments and therefore only the recovery for the most abundant compound, PFOS, was assessed here.

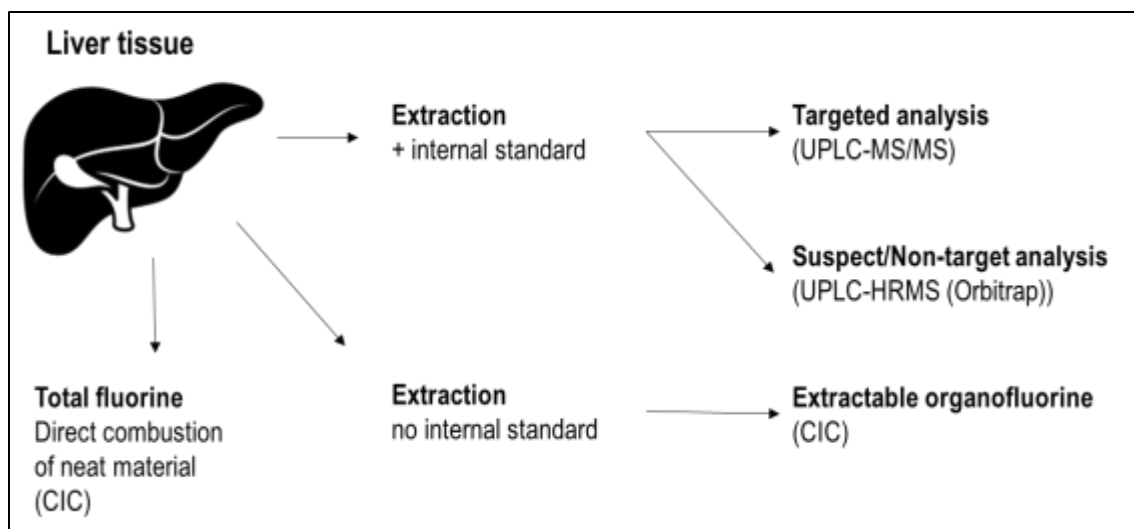

**Figure S1.** Diagram of the experimental design.

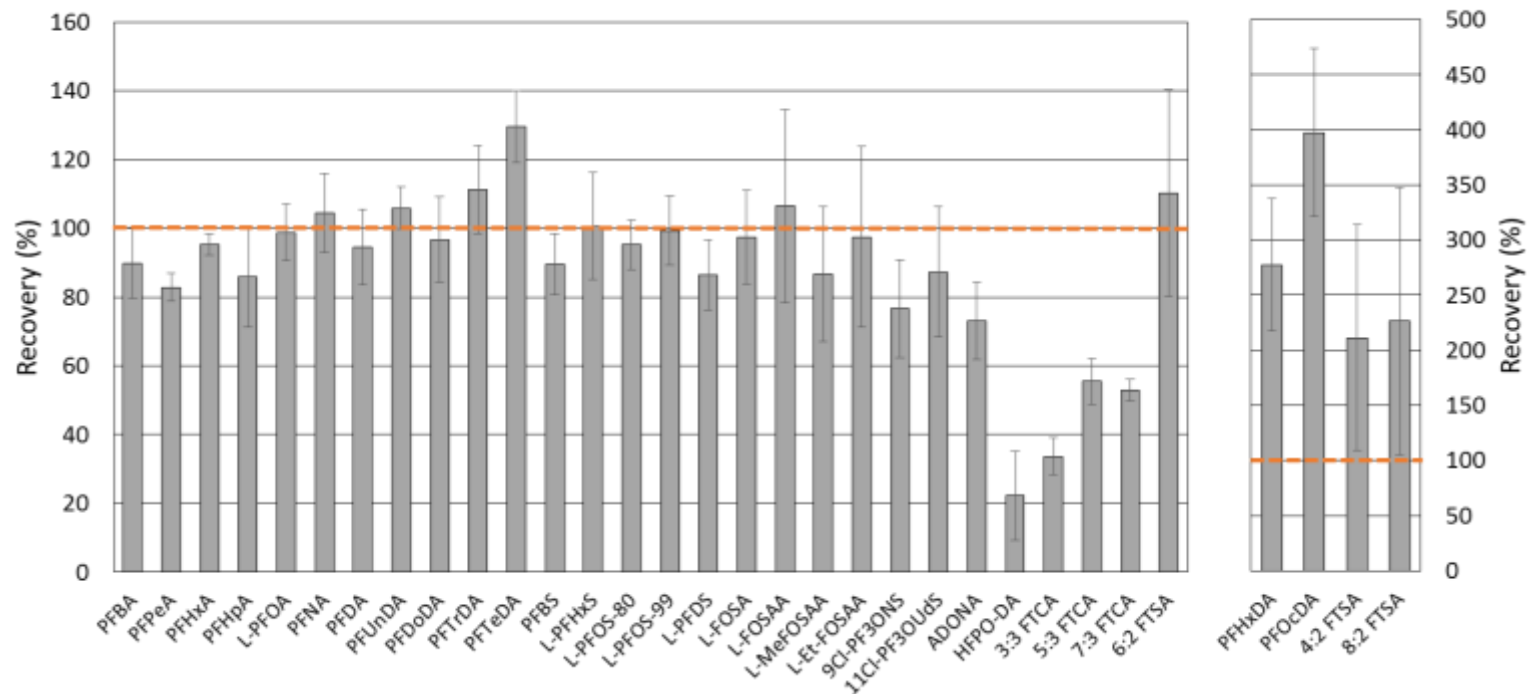

**Figure S2.** Recovery  $\pm$  standard deviation (%) of native compounds spiked in seal samples ( $n=4$ ). Right panel shows severe over-recovery of four targets, attributable to matrix-induced ionization enhancement.



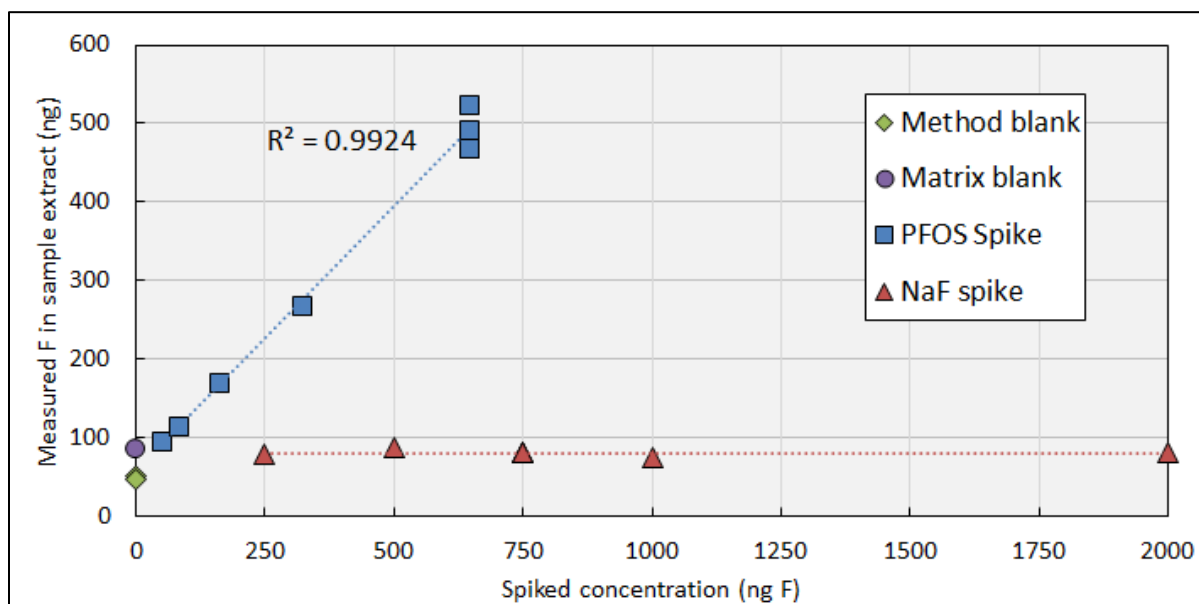

**Figure S3.** Results from spike/recovery experiments for CIC analysis. Comparison between PFOS- and NaF-spiked samples.

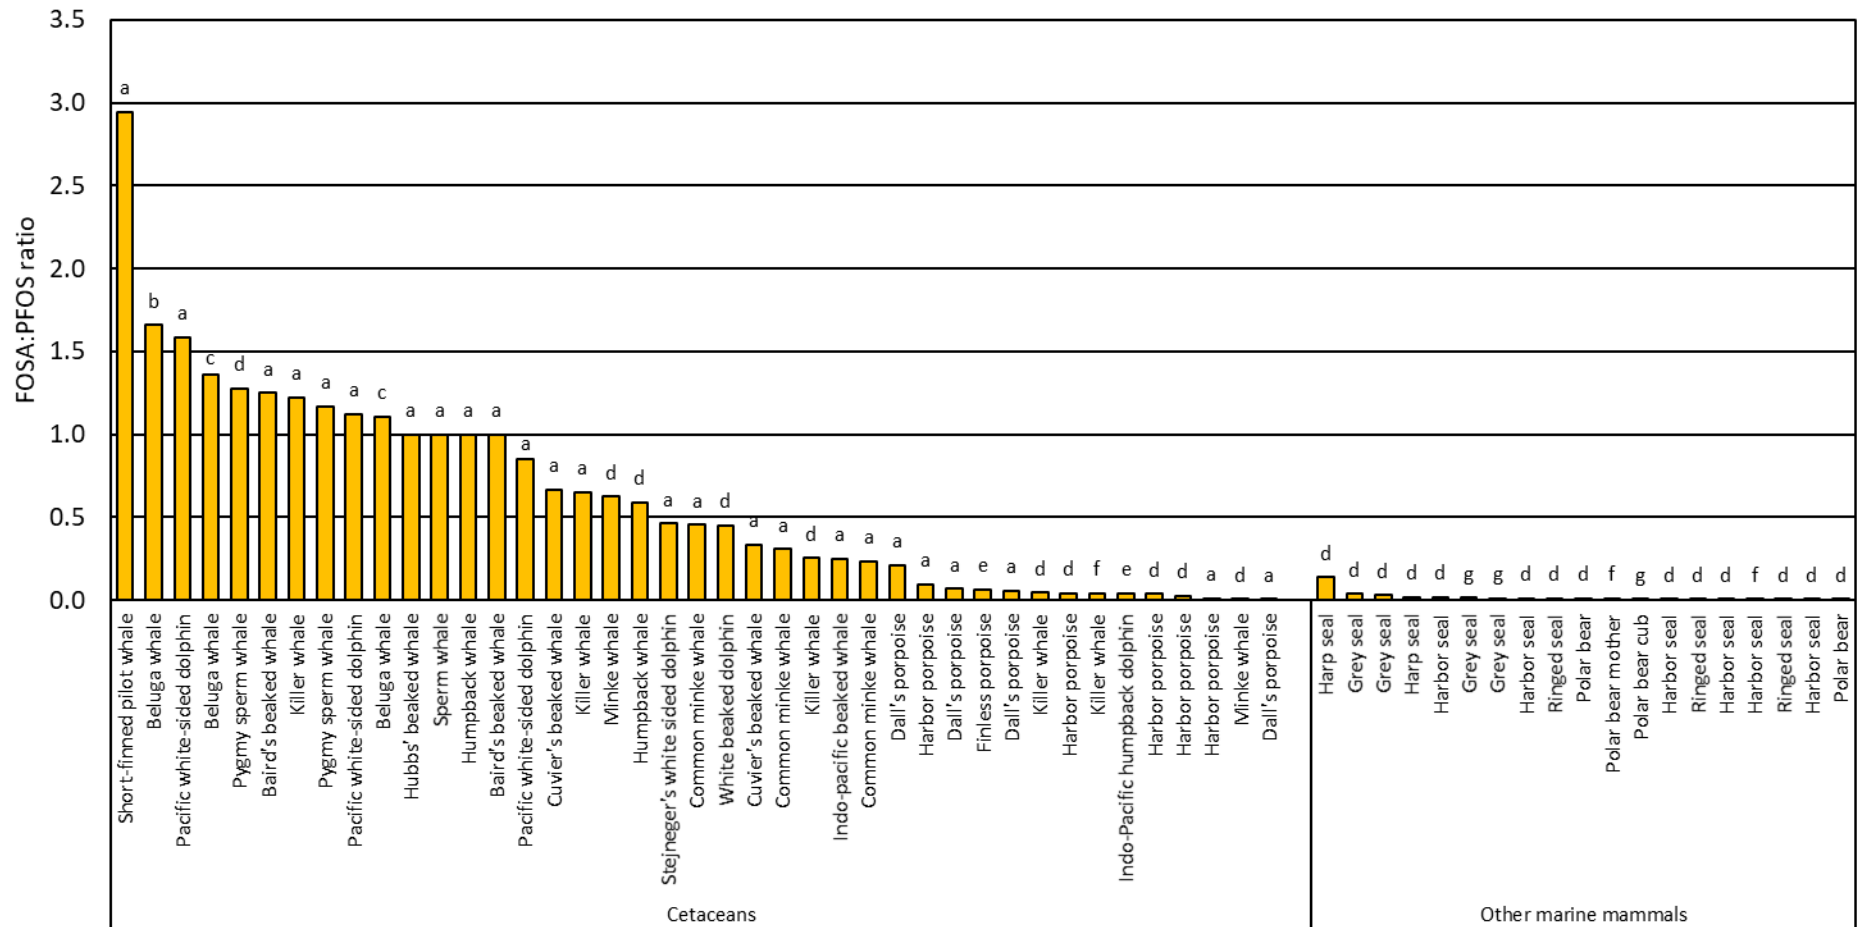

**Figure S4.** Overview on the FOSA:PFOS ratio for cetaceans and other marine mammals from literature as well as from the present study. <sup>a</sup>Fujii et al.<sup>6</sup>, <sup>b</sup>Tomy et al.<sup>7</sup>, <sup>c</sup>Kelly et al.<sup>8</sup>, <sup>d</sup>Present study, <sup>e</sup>Yeung et al.<sup>9</sup>, <sup>f</sup>Gebbink et al.<sup>10</sup>, <sup>g</sup>Shaw et al.<sup>11</sup>

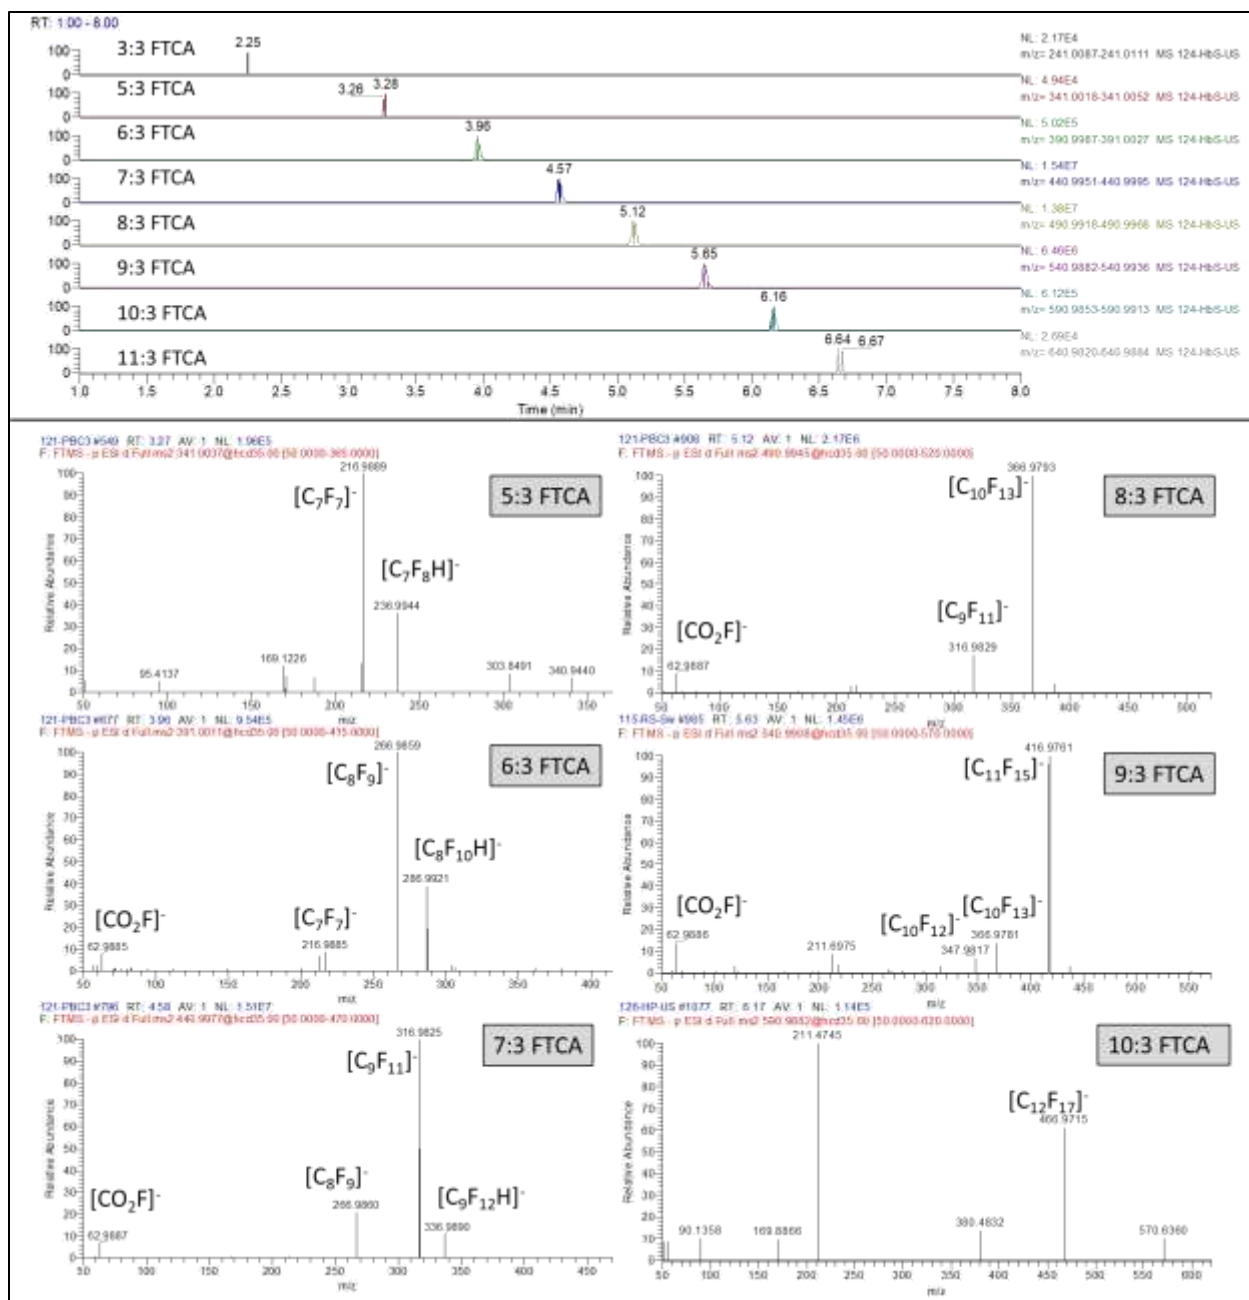

**Figure S5.** Above the EICs for x:3 FTCA (class 3) observed in harbor seal from the US are shown. MS/MS spectra including the molecular formulas belonging to the most common peaks.

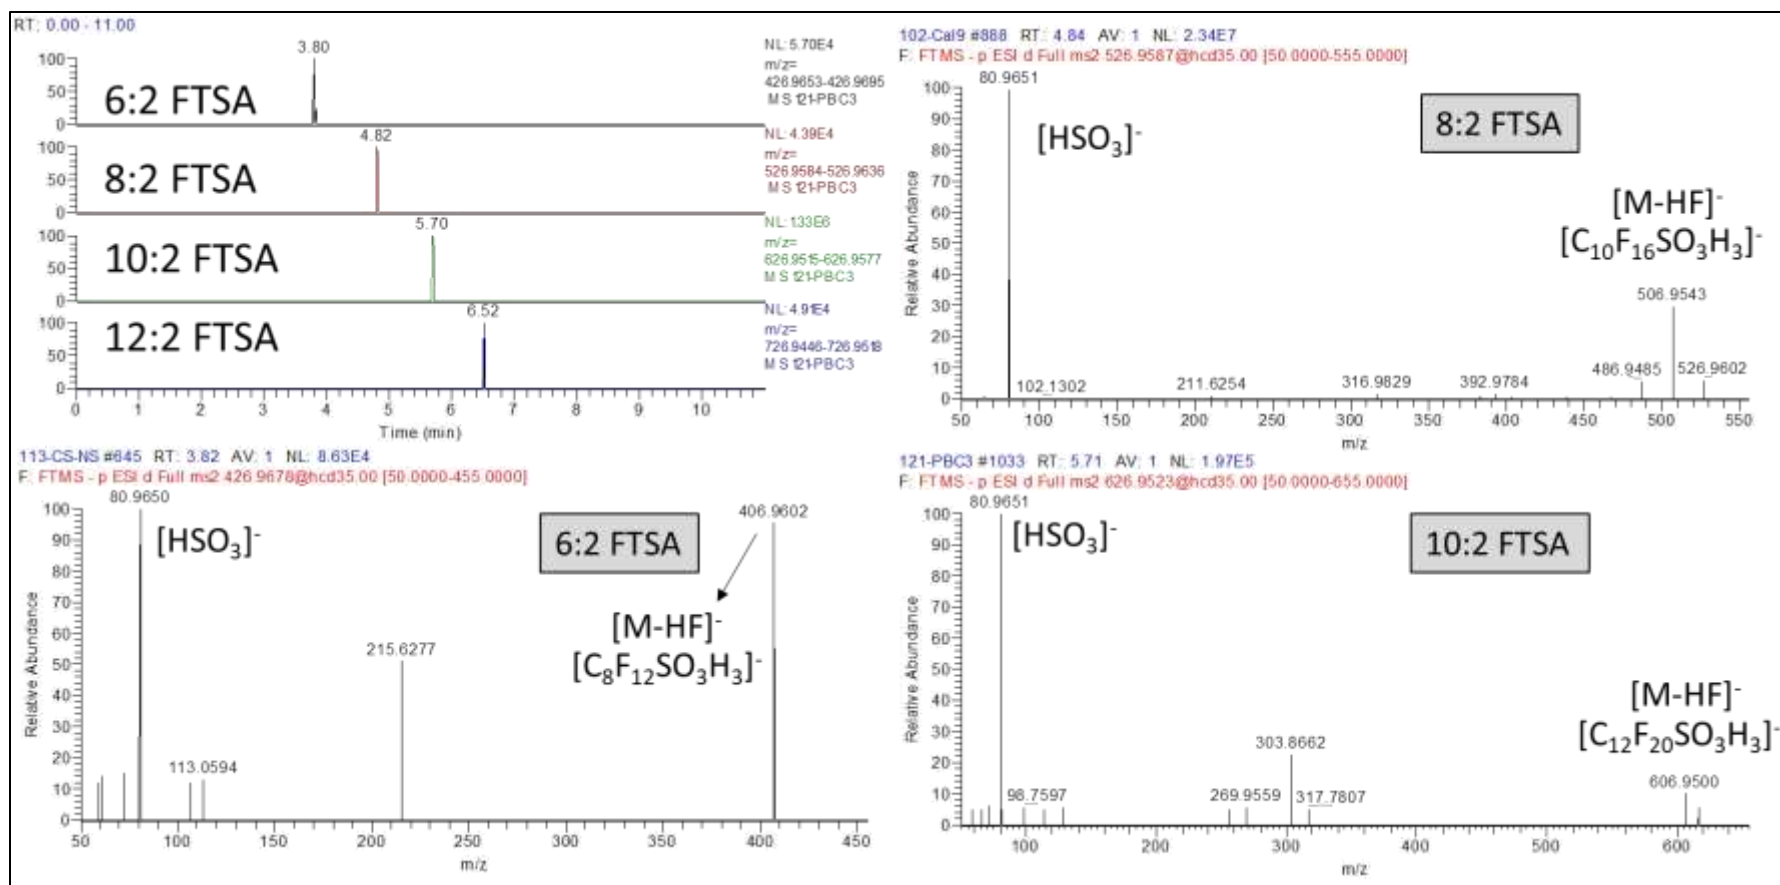

**Figure S6.** EICs of x:2 FTSA (class 4) in polar bear cub sample. MS/MS spectra from 6:2 FTSA (grey seal from Sweden), 8:2 FTSA (calibration standard), and 10:2 FTSA (polar bear cub) are shown with molecular formulas assigned to the most common peaks.

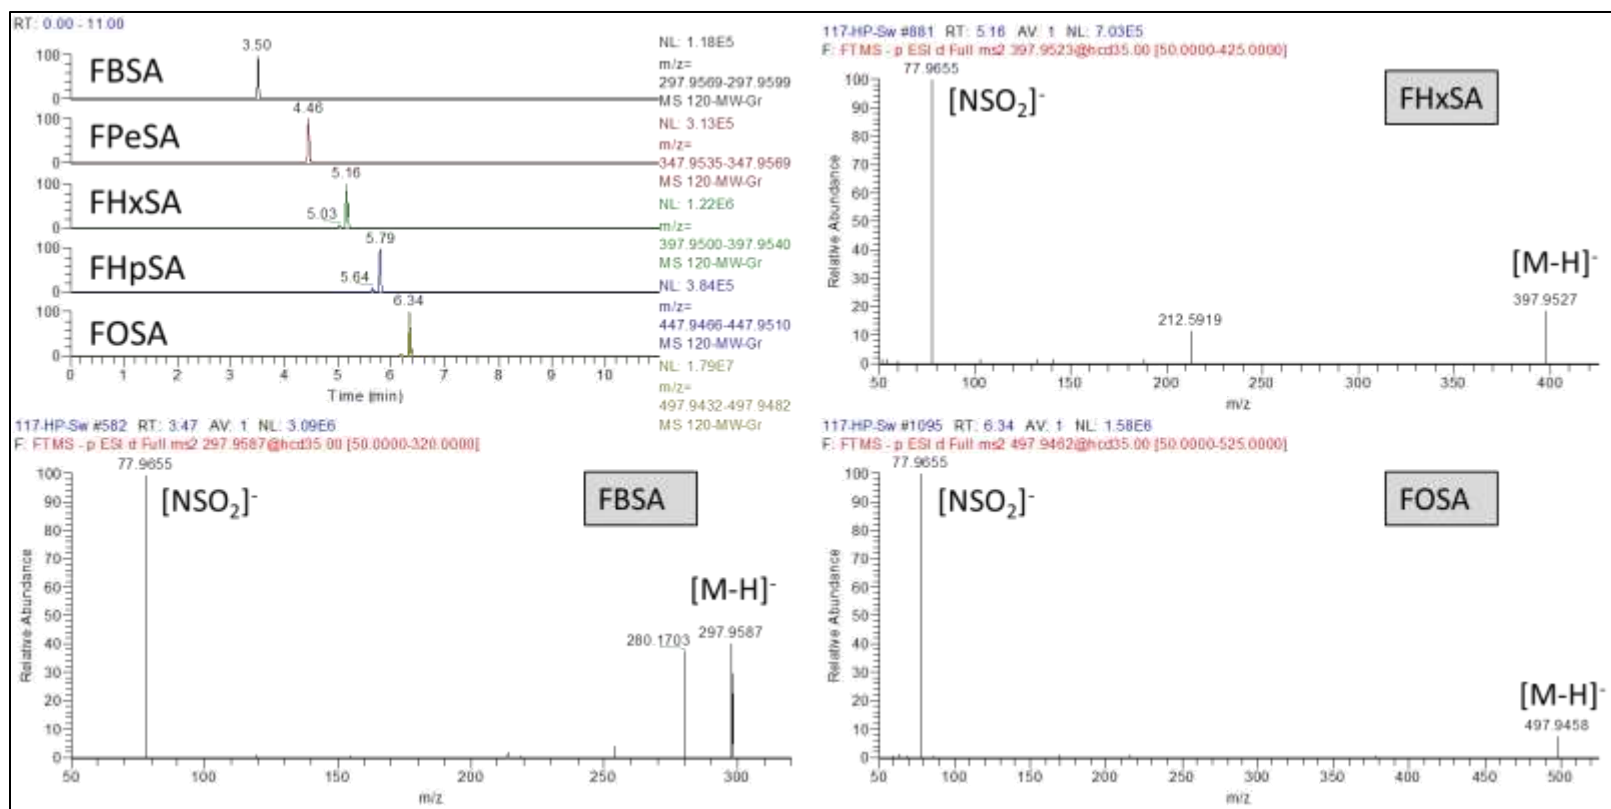

**Figure S7.** EICs of FASAs (class 5) in minke whale from Greenland. MS/MS spectra for FBSA, FHxSA, and FOSA (harbor porpoise from Sweden) are shown.

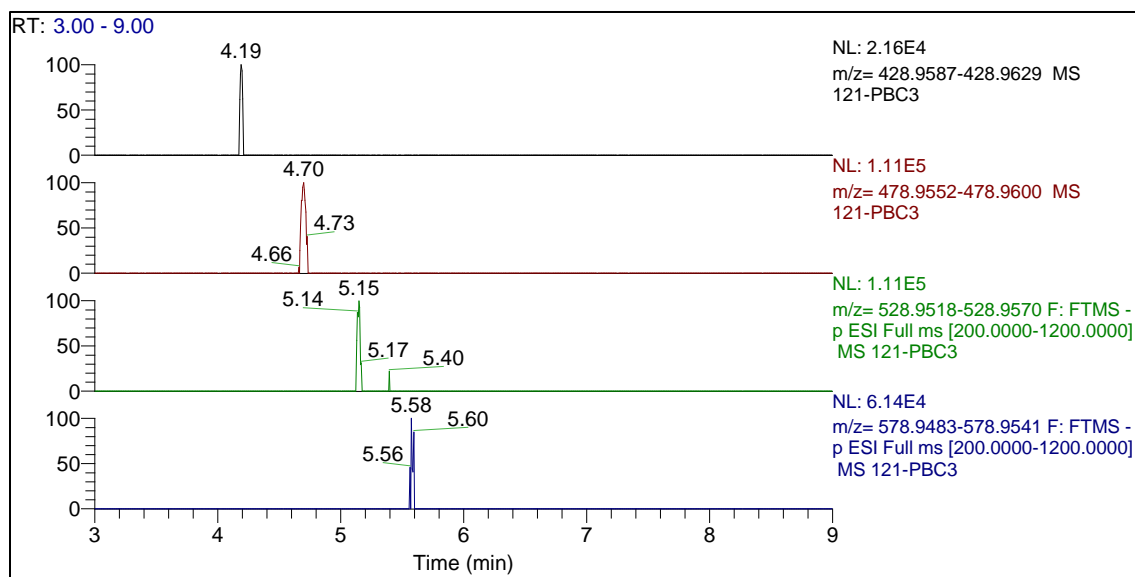

**Figure S8.** EICs for PFECAs (class 8) in polar bear cub sample. No MS/MS spectra were available.

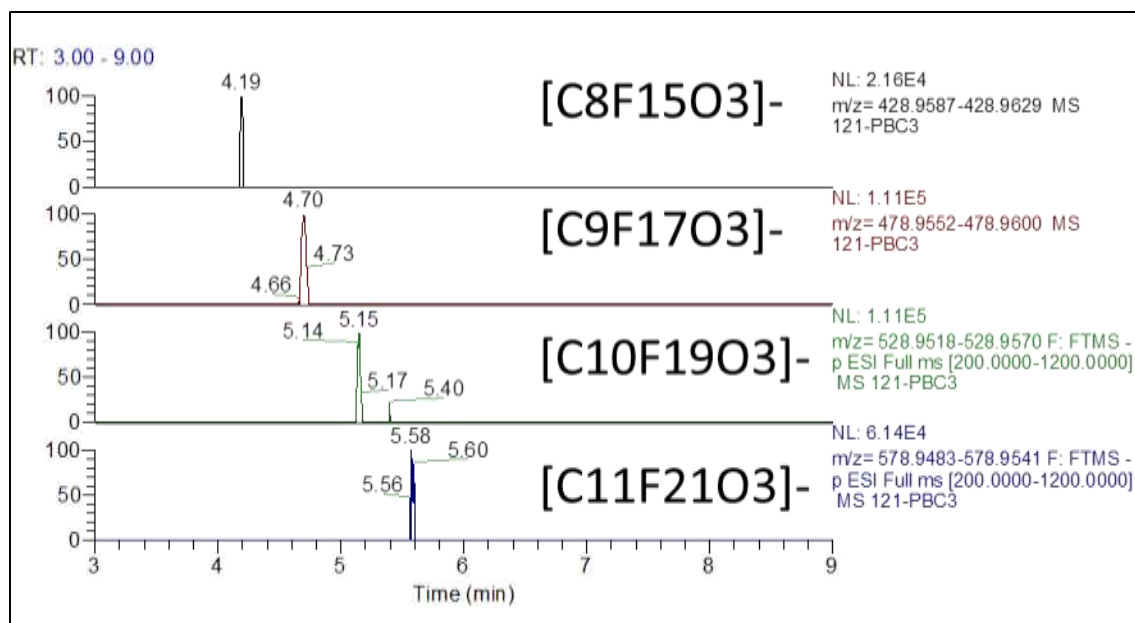

**Figure S9.** EICs for PFECAs (class 8) in polar bear cub sample. No MS/MS spectra were available.

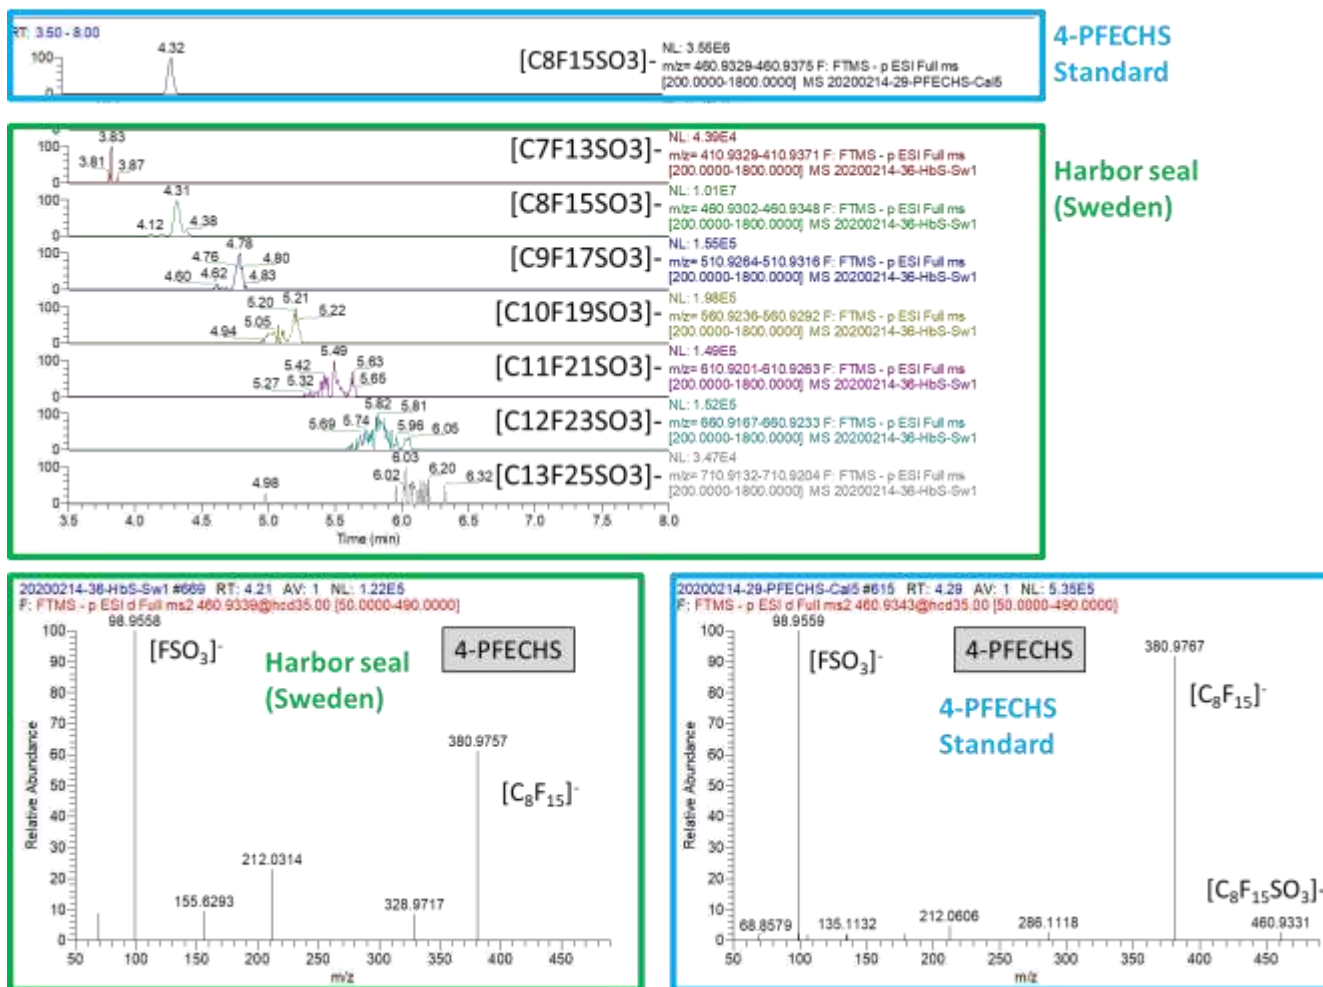

**Figure S10.** EICs for double-bond/cyclic PFSA (class 9) in harbor seal sample from Sweden, as well as the MS/MS spectrum for 4-PFECHS in harbor seal from Sweden as well as for the purchased 4-PFECHS standard.



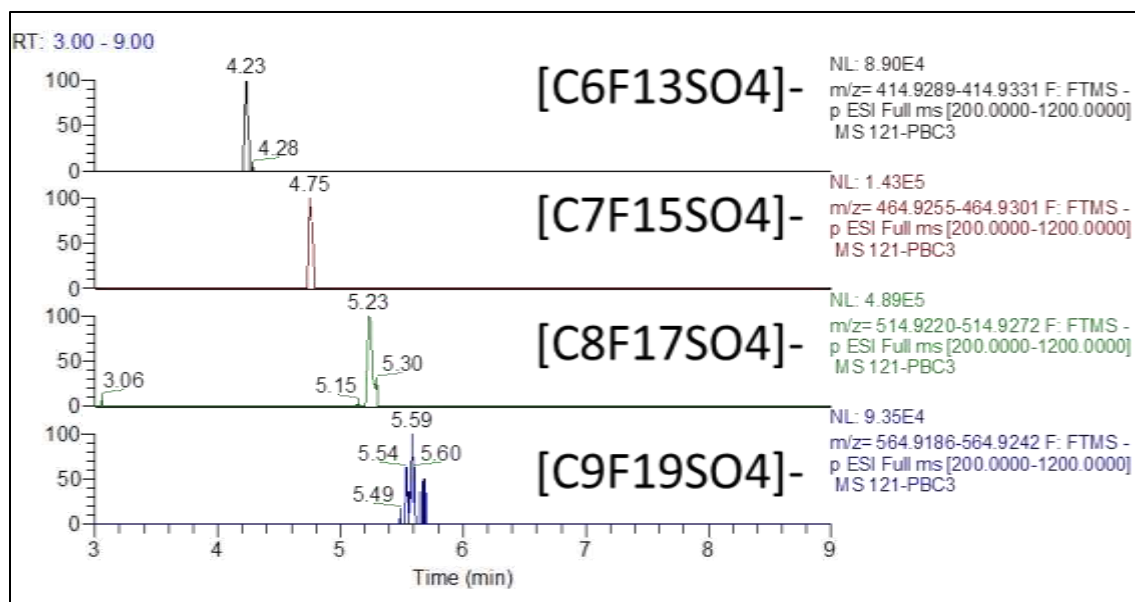

**Figure S11.** EICs of ether-PFSAs (class 10) in polar bear cub sample. No MS/MS spectra were available.

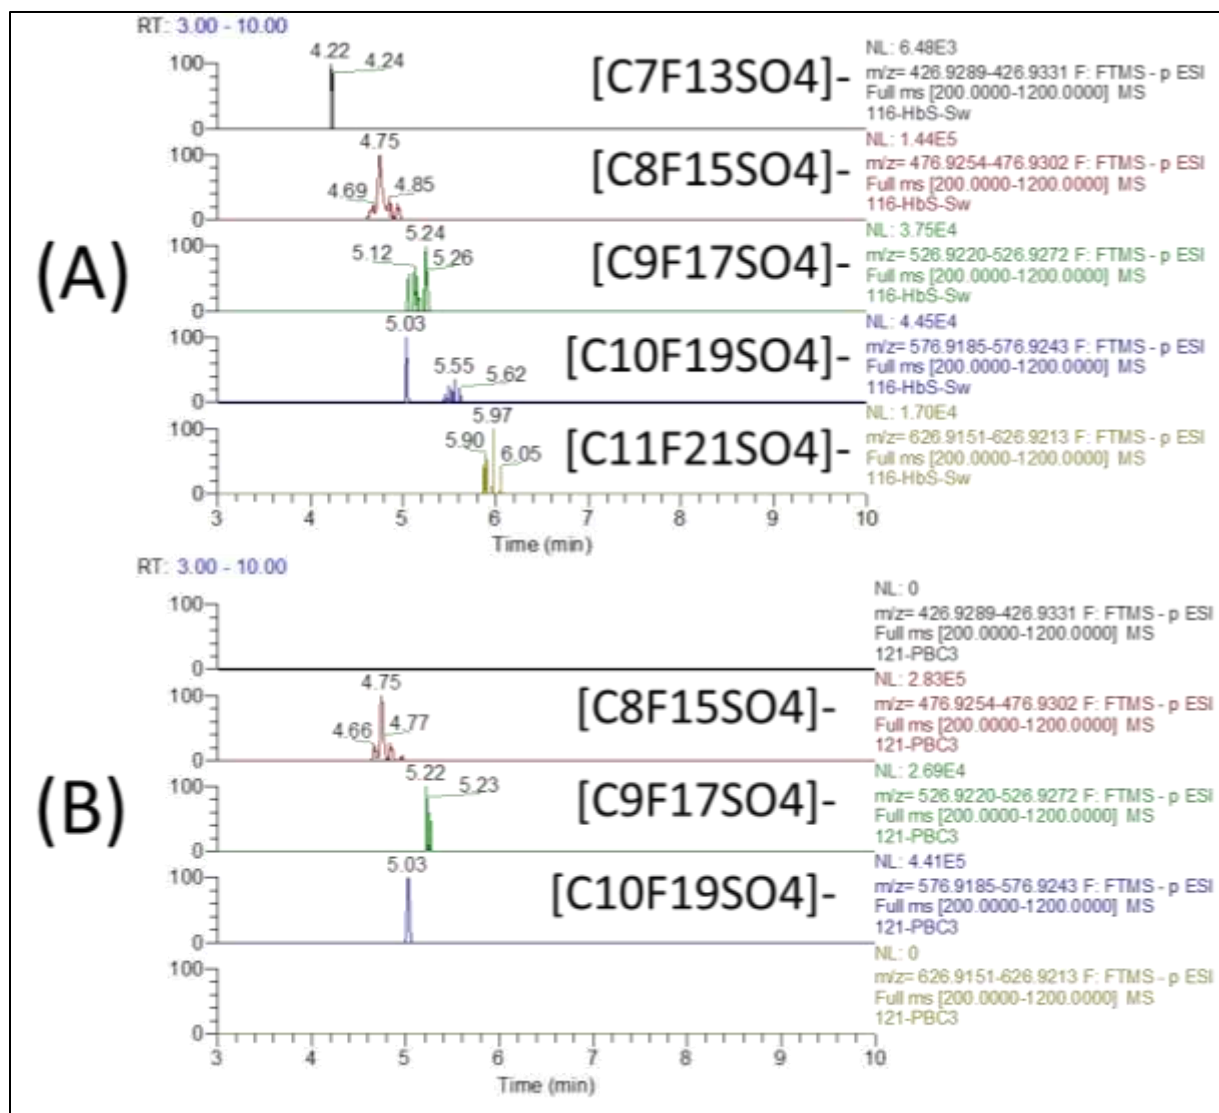

**Figure S12.** EICs of enol-ether-, cyclic- ether- or carbonyl- PFSA (class 11) in (A) harbor seal from Sweden and (B) polar bear cub.

No MS/MS spectra were available.

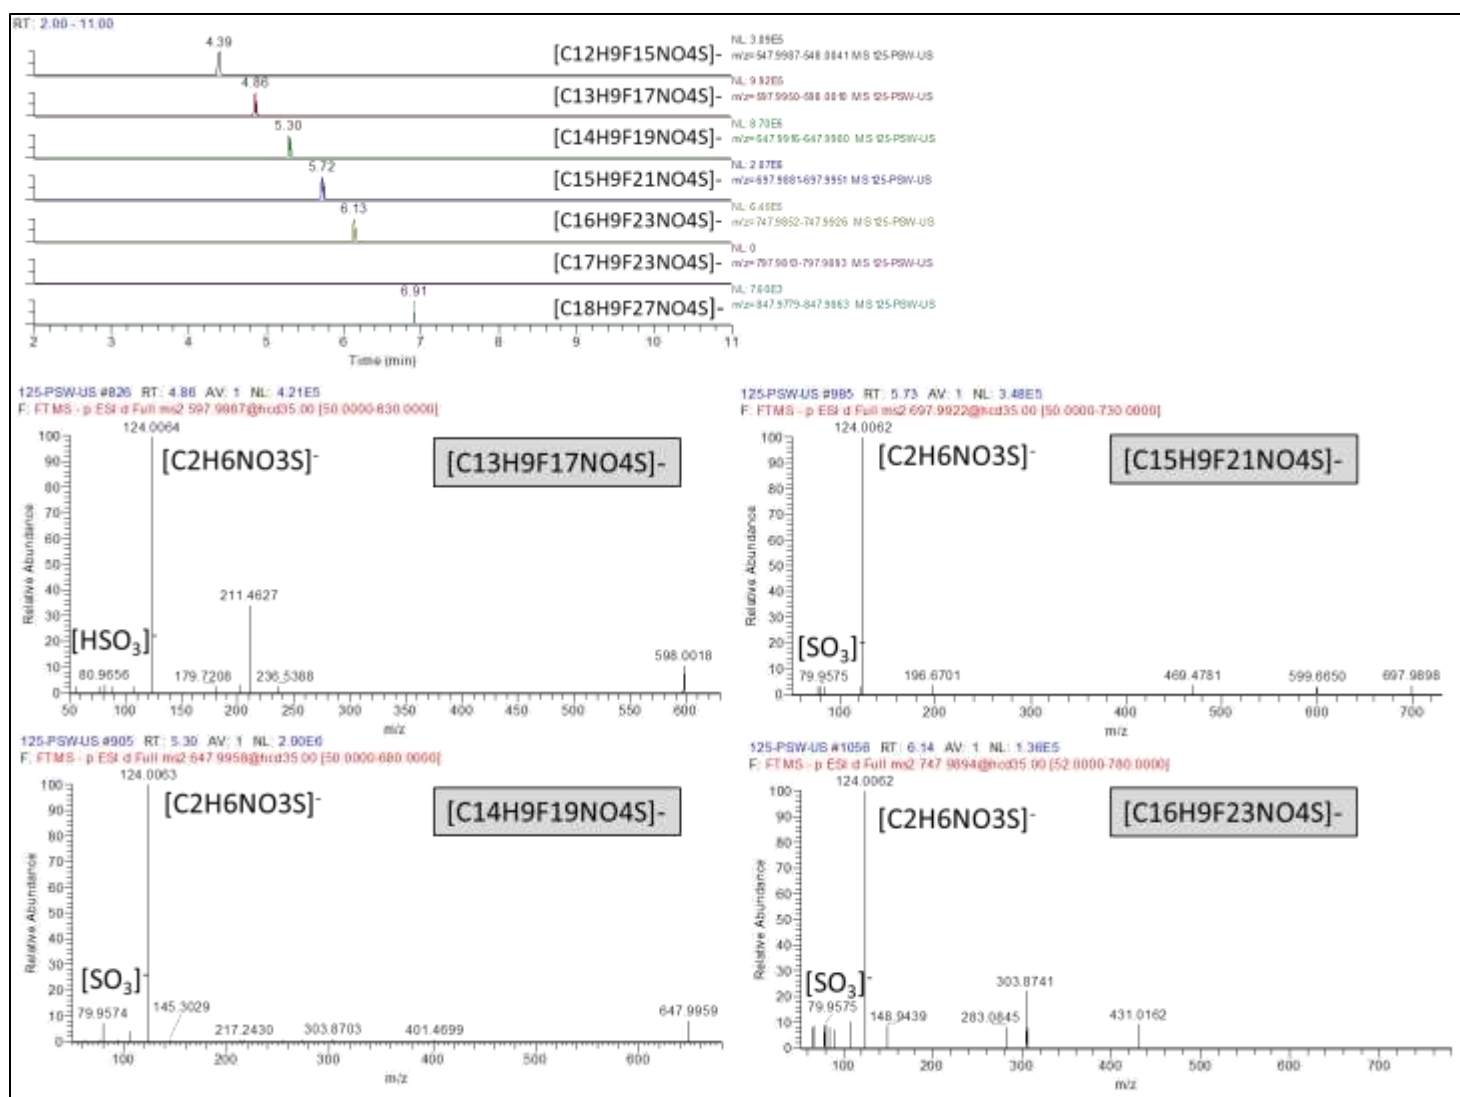

**Figure S13.** EICs for unknowns (class 12) in pygmy sperm whale. MS/MS spectra for four compounds within class 12 with molecular formulas assigned to the most common fragments.

**Table S1.** Detailed overview on the marine mammals that were assessed in this study.

| <i>Sampled by</i>                                                                 | <i>IDs</i>           | <i>Specie</i>            | <i>Latin name</i>               | <i>Year</i> | <i>Age</i>       | <i>Sex (M/F)</i>          | <i>Location</i>                    | <i>Weight (kg)</i> | <i>Length (cm)</i> |        |
|-----------------------------------------------------------------------------------|----------------------|--------------------------|---------------------------------|-------------|------------------|---------------------------|------------------------------------|--------------------|--------------------|--------|
| <i>Susan Shaw and Michelle Berger</i>                                             | MH 00670 HG, #7      | Grey seal                | <i>Halichoerus grypus</i>       | 2000        | Adult            | M                         | Narragansett Bay, RI, US           | 136                | 190                | Pooled |
|                                                                                   | MH 01830 HG,#17      | Grey seal                | <i>Halichoerus grypus</i>       | 2001        | Pup              | M                         | Narragansett Bay, RI, US           | 22.73              | 99                 |        |
|                                                                                   | NY 308404 HG, #245   | Grey seal                | <i>Halichoerus grypus</i>       | 2004        | Pup              | F                         | E Long Island, NY, US              | 21.7               | 97.2               |        |
|                                                                                   | MH 02637 HG, #314    | Grey seal                | <i>Halichoerus grypus</i>       | 2002        | Pup              | F                         | S Massachusetts, US                | 18.2               | 96                 |        |
|                                                                                   | CCSN 02243 HG, #320  | Grey seal                | <i>Halichoerus grypus</i>       | 2002        | Subadult         | M                         | Massachusetts, US                  | 136.4              | 181                |        |
|                                                                                   | MH 00543F PV, 21     | Harbor seal              | <i>Phoca vitulina</i>           | 2000        | Fetus            | F                         | Massachusetts Bay, US              | 6.4                | 64                 | Pooled |
|                                                                                   | COA020730PV, #133    | Harbor seal              | <i>Phoca vitulina</i>           | 2002        | Adult            | F                         | Midcoast, ME, US                   | 54.55              | 140                |        |
|                                                                                   | COA060622PV, #285    | Harbor seal              | <i>Phoca vitulina</i>           | 2006        | Adult            | M                         | Midcoast, ME, US                   | 63.6               | 157                |        |
|                                                                                   | COA060705PV, #333    | Harbor seal              | <i>Phoca vitulina</i>           | 2006        | Pup              | F                         | E Maine, US                        | 14.2               | 85                 |        |
|                                                                                   | COA080717PV-01, #352 | Harbor seal              | <i>Phoca vitulina</i>           | 2008        | Yearling         | M                         | Midcoast, ME, US                   | 16.6               | 100                |        |
|                                                                                   | COA060619PP, #287    | Harbor porpoise          | <i>Phocoena phocoena</i>        | 2006        | Calf             | F                         | E Maine, US                        | 9.9                | 81                 | Pooled |
|                                                                                   | COA060713PP, #289    | Harbor porpoise          | <i>Phocoena phocoena</i>        | 2006        | Adult            | F                         | Midcoast, ME, US                   | 54.5               | 145                |        |
|                                                                                   | COA060905PP, #340    | Harbor porpoise          | <i>Phocoena phocoena</i>        | 2006        | Calf             | M                         | E Maine, US                        | 11.8               | 97                 |        |
|                                                                                   | COA10100SPP, #392    | Harbor porpoise          | <i>Phocoena phocoena</i>        | 2010        | Juvenile         | M                         | E Maine, US                        | 18.2               | 116.5              |        |
|                                                                                   | COA121030PP, #410    | Harbor porpoise          | <i>Phocoena phocoena</i>        | 2012        | Juvenile         | M                         | Midcoast, ME, US                   | 23.3               | 126.8              |        |
| COA071003KB, #358                                                                 | Pygmy sperm whale    | <i>Kogia breviceps</i>   | 2007                            | Calf        | F                | Midcoast, ME              | 35                                 | 135                |                    |        |
| <i>Anna Roos, Mads Peter Heide-Jørgensen, Aqqalu Rosing-Asvid, Kristin Laidre</i> | PAX16/0331           | Harp seal                | <i>Pagophilus groenlandicus</i> | 2016        | Adult (pregnant) | F                         | Nuuk (Kobbefjord) (West Greenland) | 93                 | 145                |        |
|                                                                                   | PAX16/0329           | Ringed seal              | <i>Pusa hispida</i>             | 2013        | -                | -                         | Illulisat (North-West Greenland)   | -                  | -                  | Pooled |
|                                                                                   |                      | Ringed seal              | <i>Pusa hispida</i>             | 2013        | -                | -                         | Illulisat (North-West Greenland)   | -                  | -                  |        |
|                                                                                   |                      | Ringed seal              | <i>Pusa hispida</i>             | 2013        | -                | -                         | Illulisat (North-West Greenland)   | -                  | -                  |        |
|                                                                                   |                      | Ringed seal              | <i>Pusa hispida</i>             | 2013        | -                | -                         | Illulisat (North-West Greenland)   | -                  | -                  |        |
|                                                                                   |                      | Ringed seal              | <i>Pusa hispida</i>             | 2013        | -                | -                         | Illulisat (North-West Greenland)   | -                  | -                  |        |
|                                                                                   | PAX16/0327           | Harbor porpoise          | <i>Phocoena phocoena</i>        | 2009        | -                | -                         | Maniitsoq, West Greenland          | -                  | -                  | Pooled |
|                                                                                   |                      | Harbor porpoise          | <i>Phocoena phocoena</i>        | 2009        | -                | -                         | Maniitsoq, West Greenland          | -                  | -                  |        |
|                                                                                   |                      | Harbor porpoise          | <i>Phocoena phocoena</i>        | 2009        | -                | -                         | Maniitsoq, West Greenland          | -                  | -                  |        |
|                                                                                   |                      | Harbor porpoise          | <i>Phocoena phocoena</i>        | 2009        | -                | -                         | Maniitsoq, West Greenland          | -                  | -                  |        |
| Harbor Porpoise                                                                   |                      | <i>Phocoena phocoena</i> | 2009                            | -           | -                | Maniitsoq, West Greenland | -                                  | -                  |                    |        |

|                  |               |                                   |                                   |       |        |                          |                                    |      |        |        |
|------------------|---------------|-----------------------------------|-----------------------------------|-------|--------|--------------------------|------------------------------------|------|--------|--------|
|                  | PAX16/0328    | Humpback whale                    | <i>Megaptera novaeangliae</i>     | 2011  | -      | -                        | Nuuk (West Greenland)              | -    | -      | Pooled |
|                  |               | Humpback whale                    | <i>Megaptera novaeangliae</i>     | 2013  | -      | -                        | Nuuk (West Greenland)              | -    | -      |        |
|                  | PAX15/0326    | Minke whale                       | <i>Balaenoptera acutorostrata</i> | 2000  | -      | F                        | Qasigiannguit (West Greenland)     | -    | -      | Pooled |
|                  |               | Minke whale                       | <i>Balaenoptera acutorostrata</i> | -     | -      | -                        | Arsuk (West Greenland)             | -    | -      |        |
|                  |               | Polar bear                        | <i>Ursus maritimus</i>            | 2013  | Mother | F                        | Tasiilaq (East Greenland)          | -    | -      |        |
|                  |               | Polar bear                        | <i>Ursus maritimus</i>            | 2013  | Cub    | -                        | Tasiilaq (East Greenland)          | -    | -      |        |
|                  | PAX16/0330    | White beaked dolphin              | <i>Lagenorhynchus albirostris</i> | 2016  | -      | -                        | Tasiilaq-Kulusuc (East Greenland)  | -    | -      |        |
|                  | Minke whale   | <i>Balaenoptera acutorostrata</i> | 2017                              | Fetus |        | Tasiilaq, East Greenland | -                                  | -    |        |        |
|                  | Killer whale  | <i>Orcinus orca</i>               | 2017                              | 3     | F      | Tasiilaq, East Greenland | -                                  | -    |        |        |
| Sandra Granquist | 050510-L-FH1  | Grey seal                         | <i>Halichoerus grypus</i>         | 2010  | -      | -                        | Iceland                            | -    | -      | Pooled |
|                  | 210510-Ú-SGB7 | Grey seal                         | <i>Halichoerus grypus</i>         | 2010  | -      | -                        | Iceland                            | -    | -      |        |
|                  | 210510-Ú-SGB2 | Grey seal                         | <i>Halichoerus grypus</i>         | 2010  | -      | -                        | Iceland                            | -    | -      |        |
|                  | 210510-Ú-SGB3 | Grey seal                         | <i>Halichoerus grypus</i>         | 2010  | -      | -                        | Iceland                            | -    | -      |        |
|                  | 060709-Ú-GIB6 | Grey seal                         | <i>Halichoerus grypus</i>         | 2009  | -      | F                        | Breiðafjörður (Iceland)            | 52.5 | -      |        |
|                  | 060709-L-DB4  | Harbor seal                       | <i>Phoca vitulina</i>             | 2009  | 0      | F                        | Barðaströnd (Iceland)              | 29.5 | -      | Pooled |
|                  | 180609-L-SJH1 | Harbor seal                       | <i>Phoca vitulina</i>             | 2009  | 1      | F                        | Skagaströnd (Iceland)              | 42   | -      |        |
|                  | 080510-L-SJH1 | Harbor seal                       | <i>Phoca vitulina</i>             | 2010  | 0      | M                        | Húnaflói (Iceland)                 | 25.5 | -      |        |
|                  | 080510-L-SJH2 | Harbor seal                       | <i>Phoca vitulina</i>             | 2010  | 0      | M                        | Húnaflói (Iceland)                 | 32.5 | -      |        |
|                  | 060709-L-DB3  | Harbor seal                       | <i>Phoca vitulina</i>             | 2009  | 1      | M                        | Barðaströnd (Iceland)              | 36.5 | -      |        |
| 200409-V-GP3     | Harp seal     | <i>Pagophilus groenlandicus</i>   | 2009                              | 11    | F      | Þistilfjörður (Iceland)  | 104.5                              | -    | Pooled |        |
| 140410-V-ELS8    | Harp seal     | <i>Pagophilus groenlandicus</i>   | 2010                              | -     | -      | Iceland                  | -                                  | -    |        |        |
| 200409-V-JSH10   | Harp seal     | <i>Pagophilus groenlandicus</i>   | 2009                              | 7     | F      | Húnaflói (Iceland)       | 82.5                               | -    |        |        |
| 140410-V-ELS4    | Harp seal     | <i>Pagophilus groenlandicus</i>   | 2010                              | -     | -      | Iceland                  | -                                  | -    |        |        |
| 080510-V-SH2     | Harp seal     | <i>Pagophilus groenlandicus</i>   | 2010                              | -     | -      | Iceland                  | -                                  | -    |        |        |
| Rune Dietz,      | 46701         | Ringed seal                       | <i>Pusa hispida</i>               | 2012  | -      | -                        | Ittoqq/Scoresby Sound, E Greenland | -    | -      | Pooled |
| Frank Rigét?,    | 46702         | Ringed seal                       | <i>Pusa hispida</i>               | 2012  |        |                          | Ittoqq/Scoresby Sound, E Greenland |      |        |        |
| Christian        | 46703         | Ringed seal                       | <i>Pusa hispida</i>               | 2012  |        |                          | Ittoqq/Scoresby Sound, E Greenland |      |        |        |

|                                     |             |              |                           |      |          |   |                                    |      |      |        |
|-------------------------------------|-------------|--------------|---------------------------|------|----------|---|------------------------------------|------|------|--------|
| Sonne and<br>Aqqalu<br>Rosing-Asvid | 46706       | Ringed seal  | <i>Pusa hispida</i>       | 2012 |          |   | Ittoqq/Scoresby Sound, E Greenland |      |      |        |
|                                     | 46709       | Ringed seal  | <i>Pusa hispida</i>       | 2012 |          |   | Ittoqq/Scoresby Sound, E Greenland |      |      |        |
|                                     | 46711       | Ringed seal  | <i>Pusa hispida</i>       | 2012 |          |   | Ittoqq/Scoresby Sound, E Greenland |      |      |        |
|                                     | 46712       | Ringed seal  | <i>Pusa hispida</i>       | 2012 |          |   | Ittoqq/Scoresby Sound, E Greenland |      |      |        |
|                                     | 46714       | Ringed seal  | <i>Pusa hispida</i>       | 2012 |          |   | Ittoqq/Scoresby Sound, E Greenland |      |      |        |
|                                     | 46717       | Ringed seal  | <i>Pusa hispida</i>       | 2012 |          |   | Ittoqq/Scoresby Sound, E Greenland |      |      |        |
|                                     | 46726       | Ringed seal  | <i>Pusa hispida</i>       | 2012 |          |   | Ittoqq/Scoresby Sound, E Greenland |      |      |        |
|                                     | 35143       | Killer whale | <i>Orcinus orca</i>       | 2013 | Ad       | F | Tasilaq/Ammassalik, East Greenland | -    | -    | Pooled |
|                                     | 35144       | Killer whale | <i>Orcinus orca</i>       | 2013 | SubAd    | M | Tasilaq/Ammassalik, East Greenland |      |      |        |
|                                     | 48732       | Killer whale | <i>Orcinus orca</i>       | 2013 | Ad       | M | Tasilaq/Ammassalik, East Greenland |      |      |        |
|                                     | 48733       | Killer whale | <i>Orcinus orca</i>       | 2013 | Ad       | F | Tasilaq/Ammassalik, East Greenland |      |      |        |
|                                     | 48734       | Killer whale | <i>Orcinus orca</i>       | 2013 | Fetus    | M | Tasilaq/Ammassalik, East Greenland |      |      |        |
|                                     | 48735       | Killer whale | <i>Orcinus orca</i>       | 2013 | SubAd    | F | Tasilaq/Ammassalik, East Greenland |      |      |        |
|                                     | 46752       | Polar bear   | <i>Ursus maritimus</i>    | 2012 | 10       | M | Ittoqq/Scoresby Sound, E Greenland | -    | -    | Pooled |
|                                     | 46753       | Polar bear   | <i>Ursus maritimus</i>    | 2012 | 6        | M | Ittoqq/Scoresby Sound, E Greenland |      |      |        |
|                                     | 46754       | Polar bear   | <i>Ursus maritimus</i>    | 2201 | 7        | F | Ittoqq/Scoresby Sound, E Greenland |      |      |        |
|                                     | 46755       | Polar bear   | <i>Ursus maritimus</i>    | 2012 | 5        | F | Ittoqq/Scoresby Sound, E Greenland |      |      |        |
|                                     | 46756       | Polar bear   | <i>Ursus maritimus</i>    | 2012 | 2        | F | Ittoqq/Scoresby Sound, E Greenland |      |      |        |
|                                     | 46758       | Polar bear   | <i>Ursus maritimus</i>    | 2012 | 5        | M | Ittoqq/Scoresby Sound, E Greenland |      |      |        |
|                                     | 46759       | Polar bear   | <i>Ursus maritimus</i>    | 2012 | 5        | M | Ittoqq/Scoresby Sound, E Greenland |      |      |        |
|                                     | 46760       | Polar bear   | <i>Ursus maritimus</i>    | 2012 | 3        | M | Ittoqq/Scoresby Sound, E Greenland |      |      |        |
| Anna Roos                           | A2012/05463 | Grey seal    | <i>Halichoerus grypus</i> | 2012 | Yearling | M | Sweden                             | 117  | 34.2 | Pooled |
|                                     | A2013/05230 | Grey seal    | <i>Halichoerus grypus</i> | 2013 | Yearling | M | Sweden                             | 113  | 34   |        |
|                                     | A2015/05571 | Grey seal    | <i>Halichoerus grypus</i> | 2015 | 21       | M | Sweden                             | 145  | -    |        |
|                                     | A2015/05614 | Grey seal    | <i>Halichoerus grypus</i> | 2015 | 12       | F | Sweden                             | 115  | -    |        |
|                                     | A2016/05270 | Grey seal    | <i>Halichoerus grypus</i> | 2016 | 1        | M | Sweden                             | 50.4 | -    |        |
|                                     | A2015/05387 | Harbor seal  | <i>Phoca vitulina</i>     | 2015 | Yearling | F | Sweden                             | 18.9 | 94   | Pooled |
|                                     | A2015/05390 | Harbor seal  | <i>Phoca vitulina</i>     | 2015 | Yearling | M | Sweden                             | 19.7 | 97   |        |
|                                     | A2016/05109 | Harbor seal  | <i>Phoca vitulina</i>     | 2015 | Adult    | M | Sweden                             | 105  | -    |        |
|                                     | A2016/05167 | Harbor seal  | <i>Phoca vitulina</i>     | 2015 | Adult    | F | Sweden                             | 75   | -    |        |
|                                     | A2016/05316 | Harbor seal  | <i>Phoca vitulina</i>     | 2015 | Yearling | F | Sweden                             | 75   | -    |        |

|                           |                 |                           |      |            |   |                         |      |       |        |
|---------------------------|-----------------|---------------------------|------|------------|---|-------------------------|------|-------|--------|
| A2014/05650               | Ringed seal     | <i>Phoca hispida</i>      | 2014 | 23         | F | Northern Baltic         | -    | -     | Pooled |
| A2015/05591               | Ringed seal     | <i>Phoca hispida</i>      | 2015 | Adult      | M | Northern Baltic         | -    | -     |        |
| A2016/05110               | Ringed seal     | <i>Phoca hispida</i>      | 2015 | Yearling   | M | Northern Baltic         | 31.8 | 100.5 |        |
| A2016/05126               | Ringed seal     | <i>Phoca hispida</i>      | 2015 | Adult      | F | Northern Baltic         | 41.6 | 132   |        |
| A2016/05133               | Ringed seal     | <i>Phoca hispida</i>      | 2015 | Yearling   | F | Northern Baltic         | 37.1 | 108   |        |
| A2015/05283               | Harbor porpoise | <i>Phocoena phocoena</i>  | 2011 | Adult      | M | Southern Baltic         | -    | 145   | Pooled |
| A2016/05526               | Harbor porpoise | <i>Phocoena phocoena</i>  | 2016 | Subadult   | M | Southern Baltic         | -    | 124   |        |
| A2016/05528               | Harbor porpoise | <i>Phocoena phocoena</i>  | -    | Juvenile   | F | Southern Baltic         | -    | 114   |        |
| A2016/05637               | Harbor porpoise | <i>Phocoena phocoena</i>  | 2016 | Adult      | M | Southern Baltic         | 43   | 141.5 |        |
| C2012/00009               | Harbor porpoise | <i>Phocoena phocoena</i>  | 2011 | Adult      | M | Southern Baltic         | 45   | 154.5 |        |
| A2016/05633<br>liver 3439 | Grey seal       | <i>Halichoerus grypus</i> | 2016 | (pregnant) | F | Sweden - Gävleborgs län | -    | -     |        |

**Table S2.** Convention on International Trade in Endangered Species of Wild Fauna and Flora (CITES) numbers for export permissions.

| <b>CITES nr</b> | <b>Species</b>                        | <b>Name</b>                    |
|-----------------|---------------------------------------|--------------------------------|
| 17GL1167082     | Polar bear                            | Anna Roos                      |
| 17GL1167083     | Harbor porpoise                       | Anna Roos                      |
| 17GL1167084     | Humpback whale                        | Anna Roos                      |
| 17GL1167085     | Minke whale                           | Anna Roos                      |
| 17GL1167088     | Killer whale                          | Anna Roos                      |
| 17GL1167090     | Humpback whale                        | Anna Roos                      |
| 17GL1167098     | White beaked dolphins, East Greenland | Anna Roos                      |
| 17US18692C/9    | Pygmy sperm whale                     | Susan Shaw and Michelle Berger |
| 17US18692C/9    | Harbor porpoise                       | Susan Shaw and Michelle Berger |



**Table S3.** Target compounds according to their compound class, acronyms, and molecular formula.

|              | <b>Name</b>                    | <b>Acronym</b>        | <b>Molecular formula</b>                          |
|--------------|--------------------------------|-----------------------|---------------------------------------------------|
| <b>PFCAs</b> | Perfluorobutanoic acid         | PFBA                  | C <sub>4</sub> F <sub>7</sub> O <sub>2</sub> H    |
|              | Perfluoropentanoic acid        | PFPeA                 | C <sub>5</sub> F <sub>9</sub> O <sub>2</sub> H    |
|              | Perfluorohexanoic acid         | PFHxA                 | C <sub>6</sub> F <sub>11</sub> O <sub>2</sub> H   |
|              | Perfluoroheptanoic acid        | PFHpA                 | C <sub>7</sub> F <sub>13</sub> O <sub>2</sub> H   |
|              | Perfluorooctanoic acid         | PFOA <sup>L+Br</sup>  | C <sub>8</sub> F <sub>15</sub> O <sub>2</sub> H   |
|              | Perfluorononanoic acid         | PFNA                  | C <sub>9</sub> F <sub>17</sub> O <sub>2</sub> H   |
|              | Perfluorodecanoic acid         | PFDA                  | C <sub>10</sub> F <sub>19</sub> O <sub>2</sub> H  |
|              | Perfluoroundecanoic acid       | PFUnDA                | C <sub>11</sub> F <sub>21</sub> O <sub>2</sub> H  |
|              | Perfluorododecanoic acid       | PFDoDA                | C <sub>12</sub> F <sub>23</sub> O <sub>2</sub> H  |
|              | Perfluorotridecanoic acid      | PFTTrDA               | C <sub>13</sub> F <sub>25</sub> O <sub>2</sub> H  |
|              | Perfluorotetradecanoic acid    | PFTeDA                | C <sub>14</sub> F <sub>27</sub> O <sub>2</sub> H  |
|              | Perfluoropentadecanoic acid    | PFPeDA                | C <sub>15</sub> F <sub>29</sub> O <sub>2</sub> H  |
|              | Perfluorohexadecanoic acid     | PFHxDA                | C <sub>16</sub> F <sub>31</sub> O <sub>2</sub> H  |
|              | Perfluorooctadecanoic acid     | PFOcDA                | C <sub>18</sub> F <sub>35</sub> O <sub>2</sub> H  |
| <b>PFSAs</b> | Perfluorobutane sulfonic acid  | PFBS                  | C <sub>4</sub> F <sub>9</sub> SO <sub>3</sub> H   |
|              | Perfluoropentane sulfonic acid | PFPeS                 | C <sub>5</sub> F <sub>11</sub> SO <sub>3</sub> H  |
|              | Perfluorohexane sulfonic acid  | PFHxS <sup>L+Br</sup> | C <sub>6</sub> F <sub>13</sub> SO <sub>3</sub> H  |
|              | Perfluoroheptane sulfonic acid | PFHpS                 | C <sub>7</sub> F <sub>15</sub> SO <sub>3</sub> H  |
|              | Perfluorooctane sulfonic acid  | PFOS <sup>L+Br</sup>  | C <sub>8</sub> F <sub>17</sub> SO <sub>3</sub> H  |
|              | Perfluorononane sulfonic acid  | PFNS                  | C <sub>9</sub> F <sub>19</sub> SO <sub>3</sub> H  |
|              | Perfluorodecane sulfonic acid  | PFDS <sup>L+Br</sup>  | C <sub>10</sub> F <sub>21</sub> SO <sub>3</sub> H |

|              |                                                                        |                         |                                                                 |
|--------------|------------------------------------------------------------------------|-------------------------|-----------------------------------------------------------------|
|              | Perfluoroundecane sulfonic acid                                        | PFUnDS                  | C <sub>11</sub> F <sub>23</sub> SO <sub>3</sub> H               |
| FASA(A)s     | Perfluorooctane sulfonamide                                            | FOSA <sup>L+Br</sup>    | C <sub>8</sub> F <sub>17</sub> SO <sub>2</sub> NH <sub>2</sub>  |
|              | Perfluorooctane sulfonamidoacetic acid                                 | FOSAA <sup>L+Br</sup>   | C <sub>10</sub> F <sub>17</sub> SO <sub>4</sub> NH <sub>5</sub> |
|              | N-Methyl perfluorooctane sulfonamidoacetic acid                        | MeFOSAA <sup>L+Br</sup> | C <sub>11</sub> F <sub>17</sub> SO <sub>4</sub> NH <sub>7</sub> |
|              | N-Ethyl perfluorooctane sulfonamidoacetic acid                         | EtFOSAA <sup>L+Br</sup> | C <sub>12</sub> F <sub>17</sub> SO <sub>4</sub> NH <sub>9</sub> |
| Cl-<br>PFESA | 9-chlorohexadecafluoro-3-oxanonane-1-sulfonate                         | 9Cl-PF3ONS              | C <sub>8</sub> F <sub>16</sub> SO <sub>4</sub> ClH              |
|              | 11-chloroeicosafluoro-3-oxaundecane-1-sulfonate                        | 11Cl-PF3OUdS            | C <sub>10</sub> F <sub>20</sub> SO <sub>4</sub> ClH             |
| PFECAs       | Ammonium dodecafluoro-3H-4,8-dioxanonanoate                            | ADONA                   | C <sub>7</sub> F <sub>12</sub> NO <sub>4</sub> H <sub>5</sub>   |
|              | 2,3,3,3-Tetrafluoro-2-(1,1,2,2,3,3,3-heptafluoropropoxy)propanoic acid | HFPO-DA (GenX)          | C <sub>6</sub> F <sub>11</sub> O <sub>3</sub> H                 |
| n:3 FTCA     | 3:3 fluorotelomer carboxylic acid                                      | 3:3 FTCA                | C <sub>6</sub> F <sub>7</sub> O <sub>2</sub> H <sub>5</sub>     |
|              | 5:3 fluorotelomer carboxylic acid                                      | 5:3 FTCA                | C <sub>8</sub> F <sub>11</sub> O <sub>2</sub> H <sub>5</sub>    |
|              | 7:3 fluorotelomer carboxylic acid                                      | 7:3 FTCA                | C <sub>10</sub> F <sub>15</sub> O <sub>2</sub> H <sub>5</sub>   |
| n:2 FTSA     | 1H,1H,2H,2H-perfluorohexane sulfonate                                  | 4:2 FTSA                | C <sub>6</sub> F <sub>9</sub> SO <sub>3</sub> H <sub>5</sub>    |
|              | 1H,1H,2H,2H-perfluorooctane sulfonate                                  | 6:2 FTSA                | C <sub>8</sub> F <sub>13</sub> SO <sub>3</sub> H <sub>5</sub>   |
|              | 1H,1H,2H,2H-perfluorodecane sulfonate                                  | 8:2 FTSA                | C <sub>10</sub> F <sub>17</sub> SO <sub>3</sub> H <sub>5</sub>  |

<sup>L+Br</sup> = both linear and branched isomers are analyzed.

**Table S4.** Target analytes with their quantification and qualifications ions as well as the internal standard used for quantification. L indicates linear ions, and br indicates branched ions. All ISs were purchased from Wellington Laboratories (Guelph, Canada).

| Target Analyte | Average RT (min)  | Precursor ion | Quantitative product ion | Qualitative product ion | IS                                   | IS transition | Quantification standard | Data quality <sup>1</sup> |
|----------------|-------------------|---------------|--------------------------|-------------------------|--------------------------------------|---------------|-------------------------|---------------------------|
| PFBA           | 0.66              | 213           | 169                      | 149                     | <sup>13</sup> C <sub>4</sub> -PFBA   | 217/172       | PFBA                    | Q                         |
| PFPeA          | 1.46              | 263           | 219                      | 169                     | <sup>13</sup> C <sub>2</sub> -PFHxA  | 266/222       | PFPeA                   | Q                         |
| PFHxA          | 2.19              | 313           | 269                      | 119                     | <sup>13</sup> C <sub>2</sub> -PFHxA  | 315/270       | PFHxA                   | Q                         |
| PFHpA          | 2.63              | 363           | 319                      | 169                     | <sup>13</sup> C <sub>4</sub> -PFOA   | 367/322       | PFHpA                   | semiQ                     |
| L-PFOA         | 2.98              | 413           | 369                      | 169                     | <sup>13</sup> C <sub>4</sub> -PFOA   | 417/372       | PFOA                    | Q                         |
| br-PFOA        | 2.92              | 413           | 369                      | 169                     | <sup>13</sup> C <sub>4</sub> -PFOA   | 417/372       | PFOA                    | semiQ                     |
| PFNA           | 3.30              | 463           | 419                      | 219                     | <sup>13</sup> C <sub>5</sub> -PFNA   | 468/423       | PFNA                    | Q                         |
| PFDA           | 3.58              | 513           | 469                      | 269                     | <sup>13</sup> C <sub>2</sub> -PFDA   | 515/470       | PFDA                    | Q                         |
| PFUnDA         | 3.87              | 563           | 519                      | 269                     | <sup>13</sup> C <sub>2</sub> -PFUnDA | 565/520       | PFUnDA                  | Q                         |
| PFDoDA         | 4.14              | 613           | 569                      | 169                     | <sup>13</sup> C <sub>2</sub> -PFDoDA | 615/570       | PFDoDA                  | Q                         |
| PFTTrDA        | 4.40              | 662.9         | 619                      | 169                     | <sup>13</sup> C <sub>2</sub> -PFDoDA | 615/570       | PFTTrDA                 | semiQ                     |
| PFTeDA         | 4.65              | 712.9         | 669                      | 169                     | <sup>13</sup> C <sub>2</sub> -PFDoDA | 615/570       | PFTeDA                  | semiQ                     |
| PFPeDA         | 4.90              | 762.9         | 719                      | 169                     | <sup>13</sup> C <sub>2</sub> -PFDoDA | 615/570       | PFHxDA                  | semiQ                     |
| PFHxDA         | 5.15              | 813           | 769                      | 169                     | <sup>13</sup> C <sub>2</sub> -PFDoDA | 615/570       | PFHxDA                  | semiQ                     |
| PFOcDA         | 5.59              | 913           | 869                      | 169                     | <sup>13</sup> C <sub>2</sub> -PFDoDA | 615/570       | PFOcDA                  | semiQ                     |
| PFBS           | 2.12              | 298.9         | 80                       | 99                      | <sup>18</sup> O <sub>2</sub> -PFHxS  | 403/84        | PFBS                    | Q                         |
| PFPeS-80       | 2.57 <sup>2</sup> | 348.9         | 80                       | 99                      | <sup>18</sup> O <sub>2</sub> -PFHxS  | 403/84        | PFHxS                   | semiQ                     |
| PFPeS-99       | 2.57 <sup>2</sup> | 348.9         | 99                       | 80                      | <sup>18</sup> O <sub>2</sub> -PFHxS  | 403/84        | PFHxS                   | semiQ                     |
| L-PFHxS        | 3.02              | 398.9         | 80                       | 99                      | <sup>18</sup> O <sub>2</sub> -PFHxS  | 403/84        | PFHxS                   | Q                         |

|                     |                   |       |     |     |                                     |         |              |       |
|---------------------|-------------------|-------|-----|-----|-------------------------------------|---------|--------------|-------|
| <b>br-PFHxS</b>     | 2.97              | 399   | 80  | 99  | <sup>18</sup> O <sub>2</sub> -PFHxS | 403/84  | PFHxS        | semiQ |
| <b>PFHpS-80</b>     | 3.36              | 448.9 | 80  | 99  | <sup>18</sup> O <sub>2</sub> -PFHxS | 403/84  | PFHxS        | semiQ |
| <b>PFHpS-99</b>     | 3.36              | 448.9 | 99  | 80  | <sup>18</sup> O <sub>2</sub> -PFHxS | 403/84  | PFHxS        | semiQ |
| <b>L-PFOS-80</b>    | 3.66              | 498.9 | 80  | 99  | <sup>13</sup> C <sub>4</sub> -PFOS  | 503/80  | PFOS         | Q     |
| <b>br-PFOS-80</b>   | 3.57              | 498.9 | 80  | 99  | <sup>13</sup> C <sub>4</sub> -PFOS  | 503/80  | PFOS         | semiQ |
| <b>L-PFOS-99</b>    | 3.66              | 498.9 | 99  | 80  | <sup>13</sup> C <sub>4</sub> -PFOS  | 503/80  | PFOS         | Q     |
| <b>br-PFOS-99</b>   | 3.57              | 498.9 | 99  | 80  | <sup>13</sup> C <sub>4</sub> -PFOS  | 503/80  | PFOS         | semiQ |
| <b>PFNS-80</b>      | 3.83              | 548.9 | 80  | 99  | <sup>13</sup> C <sub>4</sub> -PFOS  | 503/80  | PFOS         | semiQ |
| <b>PFNS-99</b>      | 3.83              | 548.9 | 99  | 80  | <sup>13</sup> C <sub>4</sub> -PFOS  | 503/80  | PFOS         | semiQ |
| <b>L-PFDS</b>       | 4.23              | 598.9 | 80  | 99  | <sup>13</sup> C <sub>4</sub> -PFOS  | 503/80  | PFDS         | Q     |
| <b>br-PFDS</b>      | 4.17              | 598.9 | 80  | 99  | <sup>13</sup> C <sub>4</sub> -PFOS  | 503/80  | PFDS         | semiQ |
| <b>PFUnDS-80</b>    | 4.63 <sup>2</sup> | 648.9 | 80  | 99  | <sup>13</sup> C <sub>4</sub> -PFOS  | 503/80  | PFDS         | semiQ |
| <b>PFUnDS-99</b>    | 4.63 <sup>2</sup> | 648.9 | 99  | 80  | <sup>13</sup> C <sub>4</sub> -PFOS  | 503/80  | PFDS         | semiQ |
| <b>L-FOSA</b>       | 4.40              | 497.9 | 78  | 169 | <sup>13</sup> C <sub>8</sub> -FOSA  | 506/78  | FOSA         | Q     |
| <b>br-FOSA</b>      | 4.34              | 497.9 | 78  | 169 | <sup>13</sup> C <sub>8</sub> -FOSA  | 506/78  | FOSA         | semiQ |
| <b>L-FOSAA</b>      | 3.49              | 555.9 | 498 | 419 | D <sub>3</sub> -MeFOSAA             | 573/419 | FOSAA        | Q     |
| <b>br-FOSAA</b>     | 3.44              | 555.9 | 498 | 419 | D <sub>3</sub> -MeFOSAA             | 573/419 | FOSAA        | semiQ |
| <b>L-MeFOSAA</b>    | 3.62              | 570   | 419 | 483 | D <sub>3</sub> -MeFOSAA             | 573/419 | MeFOSAA      | Q     |
| <b>br-MeFOSAA</b>   | 3.56              | 570   | 419 | 483 | D <sub>3</sub> -MeFOSAA             | 573/419 | MeFOSAA      | semiQ |
| <b>L-EtFOSAA</b>    | 3.74              | 584   | 419 | 526 | D <sub>5</sub> -EtFOSAA             | 589/419 | EtFOSAA      | Q     |
| <b>br-EtFOSAA</b>   | 3.69              | 584   | 419 | 526 | D <sub>5</sub> -EtFOSAA             | 589/419 | EtFOSAA      | semiQ |
| <b>9Cl-PF3ONS</b>   | 3.86              | 531   | 351 | 83  | <sup>13</sup> C <sub>4</sub> -PFOS  | 503/80  | 9Cl-PF3ONS   | semiQ |
| <b>11Cl-PF3OUdS</b> | 4.42              | 631   | 451 | 83  | <sup>13</sup> C <sub>4</sub> -PFOS  | 503/80  | 11Cl-PF3OUdS | semiQ |

|                                                    |      |     |     |      |                                        |         |          |       |
|----------------------------------------------------|------|-----|-----|------|----------------------------------------|---------|----------|-------|
| <b>ADONA</b>                                       | 2.75 | 377 | 251 | 85   | <sup>13</sup> C <sub>4</sub> -PFOS     | 503/80  | ADONA    | semiQ |
| <b>HFPO-DA</b>                                     | 2.36 | 329 | 169 | 185  | <sup>13</sup> C <sub>4</sub> -PFOA     | 417/372 | HFPO-DA  | semiQ |
| <b>3:3 FTCA</b>                                    | 0.95 | 241 | 117 | 177  | <sup>13</sup> C <sub>4</sub> -PFOA     | 417/372 | 3:3 FTCA | semiQ |
| <b>5:3 FTCA</b>                                    | 2.50 | 341 | 237 | 217  | <sup>13</sup> C <sub>4</sub> -PFOA     | 417/372 | 5:3 FTCA | semiQ |
| <b>7:3 FTCA</b>                                    | 3.30 | 441 | 337 | 148  | <sup>13</sup> C <sub>4</sub> -PFOA     | 417/372 | 7:3 FTCA | semiQ |
| <b>4:2 FTSA</b>                                    | 2.03 | 327 | 307 | 80.6 | <sup>13</sup> C <sub>2</sub> -6:2 FTSA | 429/409 | 4:2 FTSA | semiQ |
| <b>6:2 FTSA</b>                                    | 2.86 | 427 | 407 | 80.6 | <sup>13</sup> C <sub>2</sub> -6:2 FTSA | 429/409 | 6:2 FTSA | Q     |
| <b>8:2 FTSA</b>                                    | 3.46 | 527 | 507 | 80.6 | <sup>13</sup> C <sub>2</sub> -6:2 FTSA | 429/409 | 8:2 FTSA | semiQ |
| <b><sup>13</sup>C<sub>8</sub>-PFOA<sup>3</sup></b> | 2.98 | 421 | 376 |      |                                        |         |          |       |
| <b><sup>13</sup>C<sub>8</sub>-PFOS<sup>3</sup></b> | 3.66 | 507 | 80  |      |                                        |         |          |       |

<sup>1</sup> Q = quantitative, semiQ = semi-quantitative for compounds lacking authentic standards and/or analogous ISs.

<sup>2</sup> Estimated retention time, based on retention times of adjacent PFASs.

<sup>3</sup> <sup>13</sup>C<sub>8</sub>-PFOA and <sup>13</sup>C<sub>8</sub>-PFOS were used as recovery internal standards.

**Table S5.** Mobile phase gradient program for targeted analysis. Flow rate was 0.4 ml/min, column temperature 50°C, injection volume 5  $\mu$ l.

| Time (min) | Mobile phase A <sup>1</sup> (%) | Mobile phase B <sup>2</sup> (%) |
|------------|---------------------------------|---------------------------------|
| 0.0        | 90                              | 10                              |
| 0.5        | 90                              | 10                              |
| 5.0        | 20                              | 80                              |
| 5.1        | 0                               | 100                             |
| 8.0        | 0                               | 100                             |
| 10.0       | 90                              | 10                              |

<sup>1</sup>Mobile phase A: 90% water and 10% acetonitrile containing 2 mM ammonium acetate. <sup>2</sup>Mobile phase B: 99% acetonitrile and 1% water containing 2 mM ammonium acetate.

**Table S6.** Limit of quantification (LOQ) for all compounds determined by the lowest calibration concentration.

| Compound            | LOQ (ng/g) | Compound                | LOQ (ng/g) | Compound             | LOQ (ng/g) |
|---------------------|------------|-------------------------|------------|----------------------|------------|
| PFBA                | 0.814      | PFOcDA                  | 15.1       | L-FOSAA <sup>a</sup> | 1.16       |
| PFPeA               | 0.290      | PFBS <sup>a</sup>       | 2.37       | L-MeFOSAA            | 0.826      |
| PFHxA               | 0.290      | L-PFHxS                 | 0.014      | L-Et-FOSAA           | 0.296      |
| PFHpA               | 0.290      | br-PFHxS <sup>b</sup>   | 0.014      | 9Cl-PF3ONS           | 0.840      |
| L-PFOA              | 0.290      | PFHpS <sup>b</sup>      | 0.014      | 11Cl-PF3OUdS         | 0.042      |
| PFNA                | 0.290      | L-PFOS-80 <sup>a</sup>  | 5.81       | ADONA                | 0.816      |
| PFDA                | 0.042      | br-PFOS-80 <sup>a</sup> | 5.81       | HFPO-DA              | 40.6       |
| PFUnDA              | 0.290      | L-PFOS-99 <sup>a</sup>  | 6.28       | 3:3 FTCA             | 105        |
| PFDoDA              | 0.290      | br-PFOS-99 <sup>a</sup> | 6.28       | 5:3 FTCA             | 106        |
| PFTTrDA             | 0.290      | L-PFDS                  | 0.040      | 7:3 FTCA             | 5.61       |
| PFTeDA              | 0.814      | br-PFDS <sup>b</sup>    | 0.040      | 4:2 FTSA             | 0.820      |
| PFPeDA <sup>b</sup> | 0.290      | L-FOSA                  | 0.302      | 6:2 FTSA             | 0.826      |
| PFHxDA              | 0.814      | br-FOSA <sup>b</sup>    | 0.302      | 8:2 FTSA             | 40.9       |

<sup>a</sup>Compounds that were present in the method blanks and for these the LOQ was determined alternatively by calculating the average contamination concentration plus ten times the standard deviation. <sup>b</sup>Compounds that were not present in the calibration curve, but that were present in the samples.

**Table S7.** Comparison of NIST serum standard reference material (SRM) 1957, reported reference values, and results from method used in the present study.

| <b>Compound</b> | <b>NIST certificate values<br/>(ng/g)</b> | <b>Gebbink et al.<sup>12</sup> (ng/g)</b> | <b>Yeung et al.<sup>13</sup> (ng/g)</b> | <b>Present study (ng/g)</b> |
|-----------------|-------------------------------------------|-------------------------------------------|-----------------------------------------|-----------------------------|
| <b>PFHpA</b>    | 0.305 ± 0.036                             | 0.2 ± 0.02                                | 0.2 ± 0.1                               | <0.29                       |
| <b>PFOA</b>     | 5 ± 0.4                                   | 3.86 ± 0.13                               | 4.1 ± 0.3                               | 5.0 ± 0.1                   |
| <b>PFNA</b>     | 0.88 ± 0.068                              | 0.72 ± 0.04                               | 0.8 ± 0.1                               | 0.8 ± 0.2                   |
| <b>PFDA</b>     | 0.39 ± 0.1                                | 0.24 ± 0.01                               | 0.3 ± 0.0                               | 0.3 ± 0.1                   |
| <b>PFUnDA</b>   | 0.174 ± 0.031                             | 0.11 ± 0.01                               | 0.1 ± 0.1                               | <0.29                       |
| <b>PFDoDA</b>   | -                                         | 0.017 ± 0.003                             | -                                       | -                           |
| <b>PFTTrDA</b>  | -                                         | 0.009 ± 0.004                             | -                                       | -                           |
| <b>PFHxS</b>    | 4 ± 0.75                                  | 3.25 ± 0.06                               | 4.1 ± 0.5                               | 4.0 ± 0.2                   |
| <b>PFOS</b>     | 21.1 ± 1.2                                | 18.5 ± 0.7                                | 19.3 ± 1.2                              | 18.4 ± 0.5                  |
| <b>FOSA</b>     | -                                         | 0.029 ± 0.007                             | -                                       | -                           |

“-“ = not detected



**Table S8.** Eluent program for the ion chromatography part of the CIC analysis.

| <b>Time (min)</b> | <b>Concentration OH<sup>-</sup> (mM)</b> |
|-------------------|------------------------------------------|
| 0.0               | 8.0                                      |
| 4.0               | 8.0                                      |
| 9.9               | 45.0                                     |
| 10.0              | 100.0                                    |
| 14.0              | 100.0                                    |
| 14.1              | 8.0                                      |
| 20.0              | 8.0                                      |

**Table S9.** Set-up parameters for the HRMS Orbitrap.

| <b>Scan parameters</b> |                       |
|------------------------|-----------------------|
| Scan typ               | Full MS               |
| Scan range             | 200-1200 m/z          |
| Fragmentation          | None or NCE(35) (z=1) |
| Resolution             | 120000                |
| Polarity               | Negative              |
| Maximum inject time    | 30/250                |
|                        |                       |

| <b>HESI source</b>        |      |
|---------------------------|------|
| Sheath gas flow rate      | 30   |
| Aux gas flow rate         | 10   |
| Sweep gas flow rate       | 0    |
| Spray voltage (kV)        | 3.70 |
| Capillary temp. (°C)      | 350  |
| S-lens RF level           | 55.0 |
| Aux gas heater temp. (°C) | 350  |

**Table S10. Concentration (ng/g or ng F/g) of PFAS, EOF and TF for sample from East Greenland and Sweden.**

|              | East Greenland           |                       |                    |                      |                    |                     |                     |                              | Sweden              |                     |                        |                              |                  |
|--------------|--------------------------|-----------------------|--------------------|----------------------|--------------------|---------------------|---------------------|------------------------------|---------------------|---------------------|------------------------|------------------------------|------------------|
|              | Polar bear mother (2013) | Polar bear cub (2013) | Polar bear* (2012) | Killer whale* (2013) | Minke whale (2017) | Killer whale (2017) | Ringed seal* (2012) | White beaked dolphin* (2017) | Harbor seal* (2015) | Ringed seal* (2015) | Grey seal* (2012-2016) | Harbor porpoise* (2011-2016) | Grey seal (2016) |
| (ng/g)       |                          |                       |                    |                      |                    |                     |                     |                              |                     |                     |                        |                              |                  |
| PFHpA        | 1.5                      | 1.4                   | 1.2                | 0.5                  | <0.29              | <0.29               | <0.29               | <0.29                        | <0.29               | <0.29               | <0.29                  | <0.29                        | <0.29            |
| PFOA (L)     | 55.3                     | 53.8                  | 27.4               | 0.7                  | <0.29              | <0.29               | 0.8                 | 0.5                          | 1.8                 | 10.6                | 2.1                    | <0.29                        | 0.7              |
| PFNA         | 451.1                    | 492.9                 | 333.9              | 20.2                 | 9.0                | 4.5                 | 13.7                | 7.7                          | 24.7                | 124.8               | 50.5                   | 3.2                          | 35.9             |
| PFDA         | 138.8                    | 153.8                 | 116.6              | 43.5                 | 21.0               | 10.5                | 10.9                | 4.9                          | 14.9                | 48.6                | 16.7                   | 7.0                          | 9.2              |
| PFUnDA       | 252.0                    | 235.3                 | 157.1              | 168.2                | 96.3               | 48.3                | 24.2                | 19.3                         | 21.4                | 45.4                | 19.3                   | 18.5                         | 7.5              |
| PFDoDA       | 25.2                     | 22.8                  | 16.5               | 28.4                 | 11.6               | 5.8                 | 2.8                 | 1.8                          | 4.2                 | 5.3                 | 2.6                    | 2.7                          | 0.9              |
| PFTTrDA      | 68.6                     | 63.4                  | 63.4               | 148.0                | 30.6               | 15.3                | 10.8                | 8.7                          | 9.8                 | 11.9                | 8.5                    | 10.4                         | 2.8              |
| PFTeDA       | 9.0                      | 8.4                   | 5.3                | 27.3                 | 6.5                | 3.3                 | 1.2                 | <0.81                        | 1.3                 | 1.4                 | 0.9                    | 1.9                          | <0.81            |
| PFPeDA       | 19.7                     | 17.3                  | 16.2               | 78.6                 | 12.9               | 6.5                 | 3.2                 | 2.7                          | 2.1                 | 2.5                 | 0.9                    | 2.0                          | 1.2              |
| PFHxDA       | <0.81                    | <0.81                 | <0.81              | 0.9                  | 1.1                | <0.81               | <0.81               | <0.81                        | <0.81               | <0.81               | <0.81                  | <0.81                        | <0.81            |
| PFBS         | <2.4                     | <2.4                  | <2.4               | <2.4                 | <2.4               | <2.4                | <2.4                | <2.4                         | <2.4                | <2.4                | <2.4                   | <2.4                         | <2.4             |
| PFHxS (L+Br) | 20.7                     | 22.3                  | 20.7               | 2.1                  | 0.9                | 0.5                 | 0.7                 | 0.9                          | 7.6                 | 3.8                 | 1.2                    | 0.7                          | 0.5              |
| PFHpS        | 14.9                     | 16.6                  | 19.8               | 0.6                  | <0.01              | <0.01               | 0.3                 | <0.01                        | 2.4                 | 1.2                 | 0.5                    | 0.1                          | 0.3              |
| PFOS (L+Br)  | 1806.5                   | 1784.3                | 1864.0             | 230.3                | 115.0              | 57.5                | 99.7                | 29.5                         | 857.9               | 483.4               | 327.8                  | 146.9                        | 172.1            |
| PFDS (L+Br)  | 8.8                      | 9.9                   | 5.6                | 3.1                  | 1.3                | 0.7                 | 0.2                 | 0.1                          | 2.8                 | 0.8                 | 1.0                    | 0.1                          | <0.04            |
| FOSA (L+Br)  | 4.5                      | 3.4                   | 7.8                | 10.4                 | 29.2               | 14.6                | 0.5                 | 13.2                         | 0.7                 | <0.3                | 3.7                    | 5.4                          | 5.2              |
| F-53B        | <0.84                    | <0.84                 | <0.84              | <0.84                | <0.84              | <0.84               | <0.84               | <0.84                        | <0.84               | <0.84               | <0.84                  | <0.84                        | <0.84            |
| 5:3 FTCA     | <106                     | <106                  | <106               | <106                 | <106               | <106                | <106                | <106                         | <106                | <106                | <106                   | <106                         | <106             |
| 7:3 FTCA     | 1130.8                   | 870.7                 | 959.4              | 132.5                | 13.7               | 12.6                | 9.2                 | <5.6                         | 31.1                | 67.1                | 6.3                    | 72.5                         | <5.6             |

|                               |        |        |        |        |       |       |       |       |       |        |       |       |       |
|-------------------------------|--------|--------|--------|--------|-------|-------|-------|-------|-------|--------|-------|-------|-------|
| <b>6:2 FTSA</b>               | <0.83  | <0.83  | <0.83  | <0.83  | <0.83 | <0.83 | <0.83 | <0.83 | <0.83 | <0.83  | <0.83 | <0.83 | <0.83 |
|                               |        |        |        |        |       |       |       |       |       |        |       |       |       |
| <b>ΣPFCAAs (ng/g)</b>         | 1021.1 | 1049.0 | 737.7  | 516.3  | 189.2 | 94.3  | 67.8  | 45.6  | 80.1  | 250.4  | 101.7 | 45.7  | 58.2  |
| <b>ΣPFSAAs (ng/g)</b>         | 1850.8 | 1833.1 | 1910.2 | 236.1  | 117.3 | 58.7  | 100.9 | 30.5  | 870.7 | 489.2  | 330.5 | 147.8 | 172.9 |
| <b>ΣPFASs (ng/g)</b>          | 4007.2 | 3756.1 | 3615.1 | 895.3  | 349.3 | 180.2 | 178.5 | 89.3  | 982.5 | 806.8  | 442.2 | 271.4 | 236.3 |
|                               |        |        |        |        |       |       |       |       |       |        |       |       |       |
| <b>ΣTarget PFASs (ng F/g)</b> | 2648.8 | 2487.6 | 2379.3 | 613.2  | 238.1 | 122.6 | 119.6 | 60.6  | 640.3 | 535.7  | 291.8 | 178.5 | 156.1 |
| <b>EOF (ng F/g)</b>           | 2015.1 | 1818.2 | 3537.5 | 892.8  | 112.8 | 186.1 | 112.7 | <158  | 358.8 | 973.2  | 275.1 | <158  | 153.4 |
| <b>TF (ng F/g)</b>            | 3164.4 | 2992.5 | 5562.9 | 2635.8 | 408.1 | 766.6 | 815.6 | 626.2 | 761.0 | 1085.6 | 684.4 | 743.3 | 568.7 |

Table S10 continued. Concentration (ng/g or ng F/g) of PFAS, EOF and TF for sample from US Atlantic coast, Iceland and West Greenland.

|              | US Atlantic coast            |                        |                          |                          | Iceland                  |                        |                        | West Greenland      |                         |                             |             |                  |
|--------------|------------------------------|------------------------|--------------------------|--------------------------|--------------------------|------------------------|------------------------|---------------------|-------------------------|-----------------------------|-------------|------------------|
|              | Harbor porpoise* (2006-2012) | Grey seal* (2000-2004) | Harbor seal* (2000-2008) | Pygmy sperm whale (2007) | Harbor seal* (2009-2010) | Harp seal* (2009-2010) | Grey seal* (2009-2010) | Minke whale* (2000) | Harbor porpoise* (2009) | Humpback whale* (2011-2013) | Ringed seal | Harp seal (2016) |
| PFHpA        | <0.29                        | <0.29                  | <0.29                    | <0.29                    | <0.29                    | <0.29                  | <0.29                  | <0.29               | <0.29                   | <0.29                       | <0.29       | <0.29            |
| PFOA (L)     | <0.29                        | 0.4                    | 1.3                      | 0.9                      | 0.5                      | <0.29                  | <0.29                  | 0.4                 | 0.5                     | <0.29                       | <0.29       | 0.4              |
| PFNA         | 0.5                          | 7.7                    | 4.4                      | 5.8                      | 6.5                      | 6.1                    | 3.1                    | 3.6                 | 3.8                     | 0.9                         | 9.7         | 5.3              |
| PFDA         | 5.3                          | 8.8                    | 2.4                      | 1.6                      | 4.2                      | 4.2                    | 1.6                    | 3.6                 | 7.4                     | 5.6                         | 5.9         | 4.0              |
| PFUnDA       | 7.6                          | 21.1                   | 5.2                      | 7.9                      | 19.8                     | 11.9                   | 5.2                    | 14.2                | 28.9                    | 28.7                        | 18.1        | 10.7             |
| PFDoDA       | 1.7                          | 4.8                    | 1.1                      | 1.8                      | 2.5                      | 1.6                    | 1.0                    | 1.8                 | 3.6                     | 3.1                         | 2.6         | 1.2              |
| PFTTrDA      | 6.8                          | 15.6                   | 7.3                      | 18.8                     | 10.6                     | 7.2                    | 4.5                    | 6.5                 | 14.3                    | 12.7                        | 10.7        | 4.7              |
| PFTeDA       | 1.3                          | 2.6                    | 1.4                      | 4.5                      | 1.4                      | <0.81                  | <0.81                  | <0.81               | 1.8                     | 2.1                         | 1.3         | <0.81            |
| PFPeDA       | 3.4                          | 4.9                    | 4.6                      | 28.0                     | 3.7                      | 3.2                    | 1.7                    | 1.8                 | 6.7                     | 9.2                         | 1.7         | 1.7              |
| PFHxDA       | <0.81                        | <0.81                  | <0.81                    | 0.8                      | <0.81                    | <0.81                  | <0.81                  | <0.81               | <0.81                   | <0.81                       | <0.81       | <0.81            |
| PFBS         | <2.4                         | <2.4                   | <2.4                     | <2.4                     | <2.4                     | <2.4                   | <2.4                   | <2.4                | <2.4                    | <2.4                        | <2.4        | <2.4             |
| PFHxS (L+Br) | 0.0                          | 0.9                    | 1.1                      | 0.3                      | 0.3                      | 0.1                    | 0.1                    | 0.7                 | 0.1                     | 0.2                         | <0.01       | 0.6              |
| PFHpS        | <0.01                        | 0.5                    | 0.3                      | 0.2                      | 0.1                      | <0.01                  | <0.01                  | 0.1                 | 0.1                     | <0.01                       | <0.01       | 0.2              |
| PFOS (L+Br)  | 69.1                         | 168.6                  | 50.0                     | 6.6                      | 37.9                     | 21.3                   | <5.8                   | 86.0                | 70.4                    | 21.0                        | 28.1        | 39.1             |
| PFDS (L+Br)  | 0.3                          | 8.7                    | 0.6                      | 0.1                      | 0.4                      | <0.04                  | <0.04                  | 2.6                 | 0.2                     | 0.6                         | 0.2         | 0.1              |
| FOSA (L+Br)  | 3.0                          | 2.2                    | 0.5                      | 8.4                      | 0.6                      | 2.9                    | <0.3                   | 53.5                | 1.7                     | 12.3                        | <0.3        | 0.8              |
| F-53B        | <0.84                        | <0.84                  | <0.84                    | <0.84                    | <0.84                    | <0.84                  | <0.84                  | <0.84               | <0.84                   | <0.84                       | <0.84       | <0.84            |

|                               |        |        |        |       |       |        |       |        |        |        |       |       |
|-------------------------------|--------|--------|--------|-------|-------|--------|-------|--------|--------|--------|-------|-------|
| <b>5:3 FTCA</b>               | <106   | <106   | <106   | <106  | <106  | <106   | <106  | <106   | <106   | <106   | <106  | <106  |
| <b>7:3 FTCA</b>               | 189.0  | 38.5   | 193.3  | 20.6  | 10.4  | <5.6   | 10.7  | <5.6   | <5.6   | <5.6   | <5.6  | <5.6  |
| <b>6:2 FTSA</b>               | <0.83  | <0.83  | <0.83  | <0.83 | <0.83 | <0.83  | <0.83 | <0.83  | <0.83  | <0.83  | <0.83 | <0.83 |
|                               |        |        |        |       |       |        |       |        |        |        |       |       |
| <b>ΣPFCAAs (ng/g)</b>         | 26.6   | 65.9   | 27.7   | 70.0  | 49.2  | 34.2   | 16.9  | 31.9   | 67.0   | 62.4   | 50.0  | 27.9  |
| <b>ΣPFSAAs (ng/g)</b>         | 69.5   | 178.6  | 52.0   | 7.1   | 38.6  | 21.4   | 0.1   | 89.4   | 70.7   | 21.8   | 28.3  | 40.0  |
| <b>ΣPFASs (ng/g)</b>          | 288.1  | 285.2  | 273.6  | 106.2 | 99.0  | 58.5   | 27.8  | 174.9  | 139.4  | 96.5   | 78.3  | 68.7  |
|                               |        |        |        |       |       |        |       |        |        |        |       |       |
| <b>ΣTarget PFASs (ng F/g)</b> | 188.0  | 188.8  | 178.6  | 73.5  | 67.1  | 40.0   | 19.0  | 115.3  | 94.5   | 66.5   | 53.7  | 46.1  |
| <b>EOF (ng F/g)</b>           | 557.8  | 666.3  | 3288.2 | 293.5 | 52.5  | <71    | <71   | <158   | <158   | <158   | <158  | <158  |
| <b>TF (ng F/g)</b>            | 1560.3 | 1433.7 | 1138.8 | 559.7 | 718.5 | 9196.0 | 298.2 | 1474.5 | 1285.4 | 1487.8 | 539.8 | 811.0 |

## REFERENCES

- (1) Powley, C. R.; George, S. W.; Ryan, T. W.; Buck, R. C. Matrix Effect-Free Analytical Methods for Determination of Perfluorinated Carboxylic Acids in Environmental Matrixes. *Anal. Chem.* **2005**, *77* (19), 6353–6358. <https://doi.org/10.1021/ac0508090>.
- (2) Miyake, Y.; Yamashita, N.; Rostkowski, P.; So, M. K.; Taniyasu, S.; Lam, P. K. S.; Kannan, K. Determination of Trace Levels of Total Fluorine in Water Using Combustion Ion Chromatography for Fluorine: A Mass Balance Approach to Determine Individual Perfluorinated Chemicals in Water. *J. Chromatogr. A* **2007**, *1143* (1–2), 98–104. <https://doi.org/10.1016/j.chroma.2006.12.071>.
- (3) Schultes, L.; Vestergren, R.; Volkova Hellström, K.; Westberg, E.; Jacobson, T.; Benskin, J. P. Per- and Polyfluoroalkyl Substances and Fluorine Mass Balance in Cosmetic Products from the Swedish Market: Implications for Environmental Emissions and Human Exposure. *Environ. Sci. Process. Impacts* **2018**. <https://doi.org/10.1039/C8EM00368H>.
- (4) Schultes, L.; Peaslee, G. F.; Brockman, J. D.; Majumdar, A.; McGuinness, S. R.; Ngwenyama, R. A.; Wilkinson, J. T.; Sandblom, O.; Ngwenyama, R. A.; Benskin, J. P. Total Fluorine Measurements in Food Packaging: How Do Current Methods Perform? *Environ. Sci. Technol. Lett.* **2019**, *6*, 73–78. <https://doi.org/10.1021/acs.estlett.8b00700>.
- (5) Miaz, L. T. Development and Application of UHPLC-Orbitrap Method for Quantitative and Suspect Screening of PFASs in Human Serum, Master's thesis, Stockholm University, 2018.
- (6) Fujii, Y.; Kato, Y.; Kozai, M.; Matsuishi, T.; Harada, K. H.; Koizumi, A.; Kimura, O.; Endo, T.; Haraguchi, K. Different Profiles of Naturally Produced and Anthropogenic Organohalogens in the Livers of Cetaceans from the Sea of Japan and the North Pacific Ocean. *Mar. Pollut. Bull.* **2018**, *136* (August), 230–242. <https://doi.org/10.1016/j.marpolbul.2018.08.051>.
- (7) Tomy, G. T.; Budakowski, W.; Halldorson, T.; Helm, P. A.; Stern, G. A.; Friesen, K.; Pepper, K.; Tittlemier, S. A.; Fisk, A. T. Fluorinated Organic Compounds in an Eastern Arctic Marine Food Web. *Environ. Sci. Technol.* **2004**, *38* (24), 6475–6481. <https://doi.org/10.1021/es049620g>.
- (8) Kelly, B. C.; Ikonomidou, M. G.; Blair, J. D.; SurrIDGE, B.; Hoover, D.; Grace, R.; Gobas, F. A. P. C. Perfluoroalkyl Contaminants in an Arctic Marine Food Web: Trophic

- Magnification and Wildlife Exposure. *Environ. Sci. Technol.* **2009**, *43* (11), 4037–4043. <https://doi.org/10.1021/es9003894>.
- (9) Yeung, L. W. Y.; Miyake, Y.; Li, P.; Taniyasu, S.; Kannan, K.; Guruge, K. S.; Lam, P. K. S.; Yamashita, N. Comparison of Total Fluorine, Extractable Organic Fluorine and Perfluorinated Compounds in the Blood of Wild and Perfluorooctanoate (PFOA)-Exposed Rats: Evidence for the Presence of Other Organofluorine Compounds. *Anal. Chim. Acta* **2009**, *635* (1), 108–114. <https://doi.org/10.1016/j.aca.2009.01.004>.
- (10) Gebbink, W. A.; Bossi, R.; Rigét, F. F.; Rosing-Asvid, A.; Sonne, C.; Dietz, R. Observation of Emerging Per- and Polyfluoroalkyl Substances (PFASs) in Greenland Marine Mammals. *Chemosphere* **2016**, *144*, 2384–2391. <https://doi.org/10.1016/j.chemosphere.2015.10.116>.
- (11) Shaw, S.; Berger, M. L.; Brenner, D.; Tao, L.; Wu, Q.; Kannan, K. Specific Accumulation of Perfluorochemicals in Harbor Seals (*Phoca Vitulina Concolor*) from the Northwest Atlantic. *Chemosphere* **2009**, *74* (8), 1037–1043. <https://doi.org/10.1016/j.chemosphere.2008.10.063>.
- (12) Gebbink, W. A.; Glynn, A.; Darnerud, P. O.; Berger, U. Perfluoroalkyl Acids and Their Precursors in Swedish Food: The Relative Importance of Direct and Indirect Dietary Exposure. *Environ. Pollut.* **2015**, *198*, 108–115. <https://doi.org/10.1016/j.envpol.2014.12.022>.
- (13) Yeung, L. W. Y.; De Silva, A. O.; Loi, E. I. H.; Marvin, C. H.; Taniyasu, S.; Yamashita, N.; Mabury, S. A.; Muir, D. C. G.; Lam, P. K. S. Perfluoroalkyl Substances and Extractable Organic Fluorine in Surface Sediments and Cores from Lake Ontario. *Environ. Int.* **2013**, *59* (2013), 389–397. <https://doi.org/10.1016/j.envint.2013.06.026>.
